# Supplementary material
Source: publisher site journal article supplement (https://www.dovepress.com/article/551572)
Supplement: Supplementary file 1 [file Supplementary_Material.docx_1.docx]

**Supplementary Figure 1.** Questionnaire used for model evaluation.

This figure presents the set of 25 patient-oriented questions related to osteoporosis that were used to query each large language model (LLM). The questions were derived from authoritative patient education resources and refined by a multidisciplinary expert panel to ensure clinical relevance and linguistic clarity.


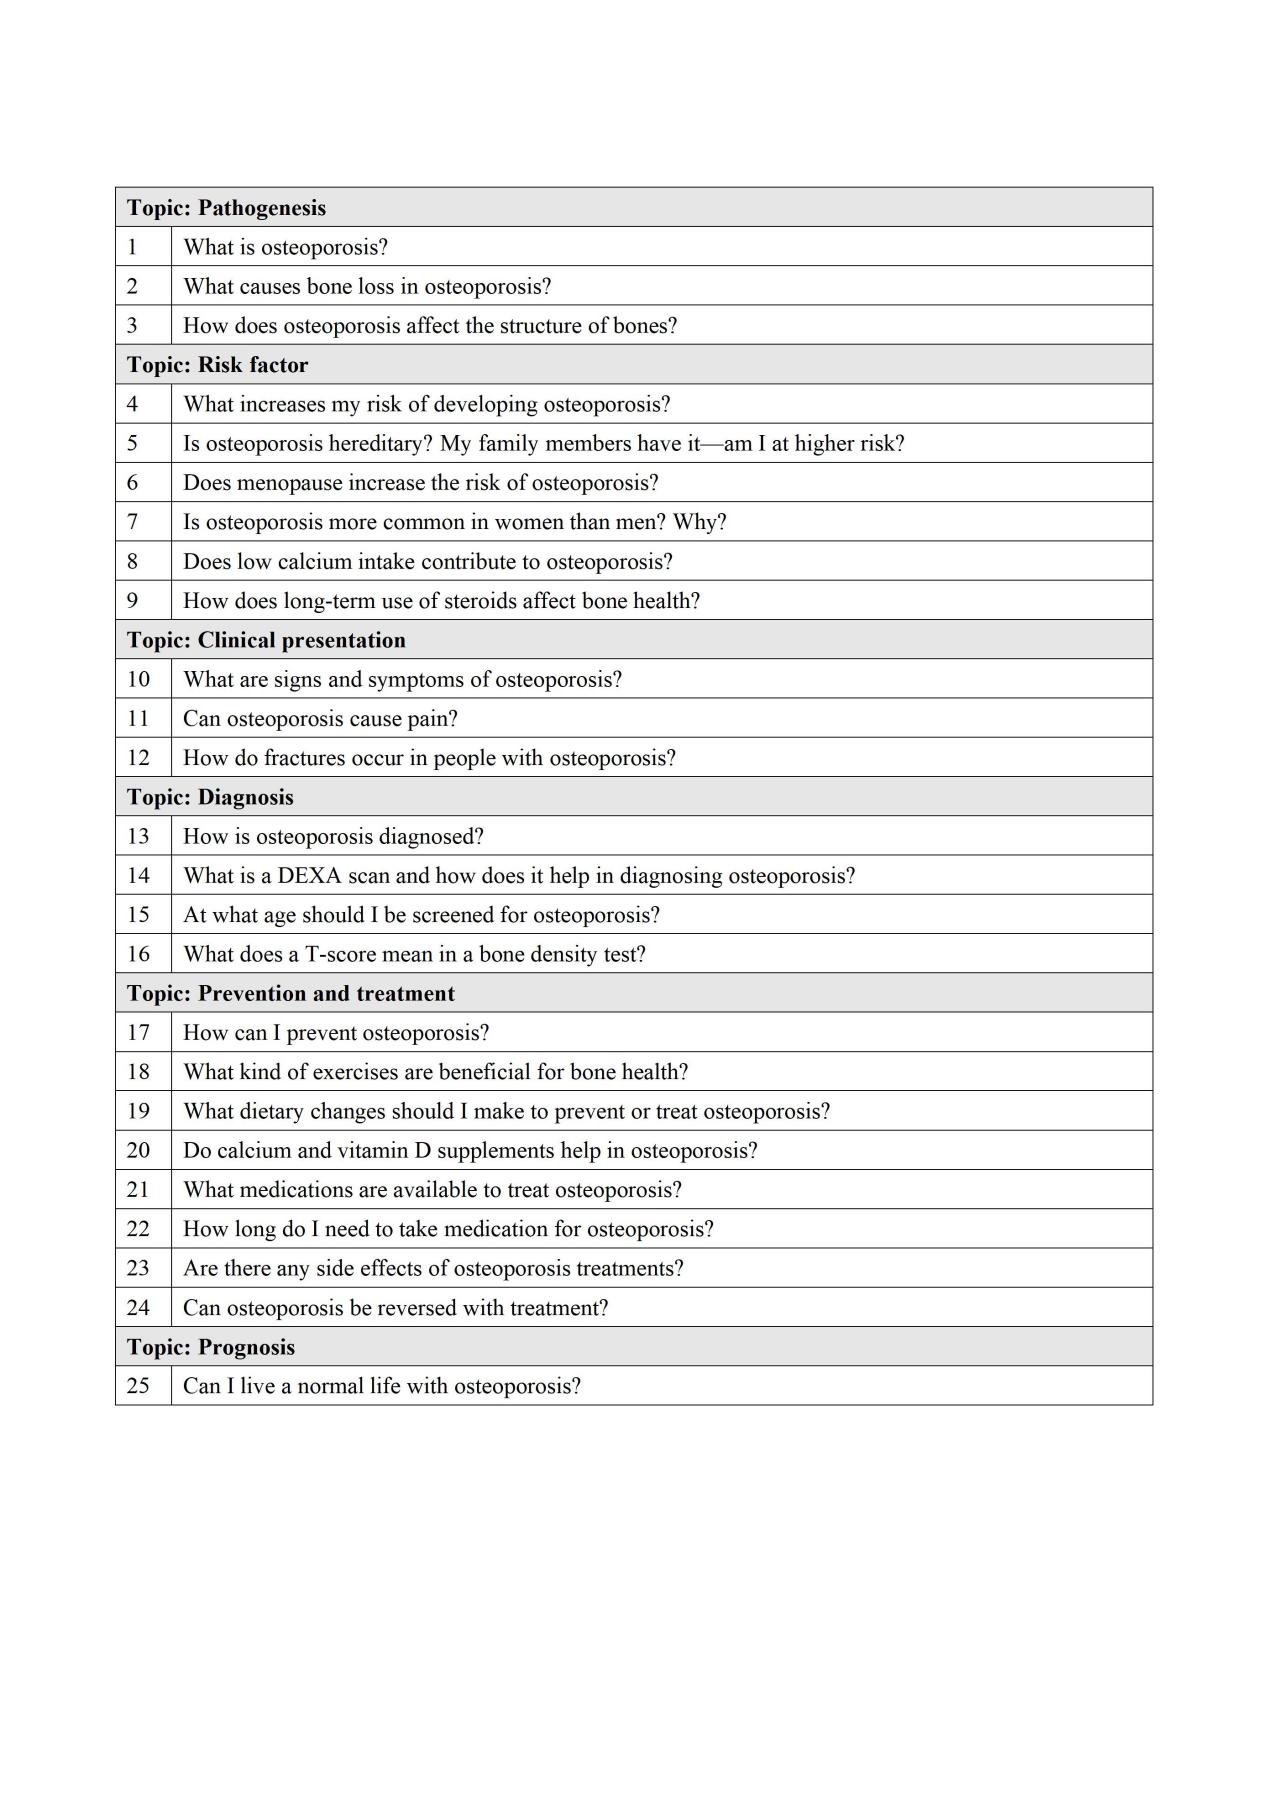


**Supplementary Table 1.** Model-generated responses from ChatGPT-4o.

Full text of the 25 question–response pairs generated by ChatGPT-4o. Each response corresponds to one question from Supplementary Figure 1 and was produced in an independent session without contextual memory.

| **Question** | **ChatGPT-4o Response** |
| --- | --- |
| **Topic: Pathogenesis** | |
| **What is osteoporosis?** | Osteoporosis is a chronic medical condition characterized by decreased bone mass and deterioration of bone tissue, leading to increased bone fragility and risk of fractures. It is often called the “silent disease” because it typically progresses without symptoms until a fracture occurs, usually in the hip, spine, or wrist.  Key Features:  Low bone mineral density (BMD): Assessed commonly by a dual-energy X-ray absorptiometry (DEXA) scan.  Microarchitectural deterioration: The internal structure of bone becomes porous and weak.  Fracture risk: Even minor stresses or falls can cause fractures, particularly in the elderly.  Causes and Risk Factors:  Aging: Most common in postmenopausal women due to decreased estrogen levels.  Nutritional deficiencies: Low calcium and vitamin D intake.  Sedentary lifestyle: Lack of weight-bearing exercise.  Genetics: Family history of osteoporosis or fractures.  Medical conditions: Rheumatoid arthritis, hyperthyroidism, and others.  Medications: Long-term use of corticosteroids, anticonvulsants, etc.  Diagnosis:  Bone mineral density test (DEXA scan)  T-score:  Normal: ≥ -1.0  Osteopenia: -1.0 to -2.5  Osteoporosis: ≤ -2.5  Management:  Lifestyle: Adequate calcium and vitamin D, regular exercise, smoking cessation, limiting alcohol.  Pharmacologic:  Bisphosphonates (e.g., alendronate)  Denosumab  Selective estrogen receptor modulators (SERMs)  Hormone replacement therapy (HRT) in select patients  Teriparatide or abaloparatide (parathyroid hormone analogs) |
| **What causes bone loss in osteoporosis?** | Bone loss in osteoporosis occurs when the balance between bone formation and bone resorption is disrupted, leading to more bone being broken down than is rebuilt. Here are the primary causes:  1. Hormonal Changes  Estrogen deficiency (especially after menopause) is the most common cause in women. Estrogen helps maintain bone density.  Testosterone deficiency in men can also lead to bone loss.  2. Aging  Bone remodeling slows with age. Osteoblast activity (bone formation) decreases, while osteoclast activity (bone resorption) may remain the same or increase.  3. Nutritional Deficiencies  Calcium and vitamin D deficiencies impair bone mineralization.  Inadequate protein intake may also contribute to weaker bone matrix formation.  4. Sedentary Lifestyle  Lack of weight-bearing or resistance exercise leads to weaker bones because mechanical stress is crucial for maintaining bone density.  5. Certain Medications  Glucocorticoids (e.g., prednisone) impair bone formation and increase resorption.  Other drugs: anticonvulsants, proton pump inhibitors, aromatase inhibitors, and some cancer therapies.  6. Chronic Medical Conditions  Examples include:  Hyperthyroidism  Hyperparathyroidism  Rheumatoid arthritis  Chronic kidney disease  Malabsorption syndromes (e.g., celiac disease)  7. Lifestyle Factors  Smoking reduces osteoblast function and impairs calcium absorption.  Excessive alcohol disrupts bone remodeling and hormone balance.  8. Genetic Predisposition  Family history increases risk.  Ethnic factors: Caucasian and Asian women are at higher risk.  Bone loss in osteoporosis is often silent until a fracture occurs, making prevention and early detection critical. |
| **How does osteoporosis affect the structure of bones?** | Osteoporosis affects the structure of bones by reducing their density and microarchitectural integrity, making them more fragile and prone to fractures. Here’s a breakdown of the structural changes:  1. Loss of Bone Mass  Bone mineral density (BMD) decreases due to an imbalance between bone resorption (by osteoclasts) and bone formation (by osteoblasts).  This reduction occurs in both trabecular (spongy) and cortical (compact) bone, but trabecular bone is affected more rapidly due to its higher surface area and metabolic activity.  2. Trabecular Bone Changes  The trabeculae (internal struts or rods) become thinner, fewer, and more disconnected.  This compromises the structural support and mechanical strength of bone, especially in areas like the spine, hips, and wrists.  3. Cortical Bone Changes  The cortex becomes thinner and more porous.  Increased cortical porosity further weakens the bone, especially in long bones like the femur and radius.  4. Increased Fragility  These structural deteriorations make bones more susceptible to microfractures and macrofractures from even minor stresses or falls.  5. Altered Bone Remodeling  Bone turnover is often accelerated, especially in postmenopausal osteoporosis, with increased resorption that is not adequately matched by formation.  Clinical Implications:  Common fracture sites: vertebrae, femoral neck, distal radius (Colles’ fracture).  Vertebral fractures can lead to kyphosis, loss of height, and chronic pain.  In essence, osteoporosis turns bones from being dense and resilient to fragile and brittle, significantly increasing the risk of fractures and related morbidity. |
| **Topic: Risk factor** | |
| **What increases my risk of developing osteoporosis?** | Several factors can increase your risk of developing osteoporosis, a condition characterized by weakened bones and an increased risk of fractures. These risk factors fall into two categories: non-modifiable (you can't change them) and modifiable (you can change or influence them).  Non-Modifiable Risk Factors  These are factors you cannot control:  Age: Risk increases significantly after age 50.  Sex: Women, especially postmenopausal, are at higher risk due to lower estrogen levels.  Family history: A parent or sibling with osteoporosis or fractures increases your risk.  Ethnicity: Caucasian and Asian populations are at higher risk.  Body frame size: People with small body frames tend to have a higher risk due to having less bone mass to draw from as they age.  Modifiable Risk Factors  These are factors you may be able to change:  Lifestyle Factors  Low calcium or vitamin D intake  Sedentary lifestyle or lack of weight-bearing exercise  Excessive alcohol consumption  Smoking  Medical Conditions  Hyperthyroidism or hyperparathyroidism  Malabsorption syndromes (e.g., celiac disease, Crohn’s disease)  Chronic kidney disease  Rheumatoid arthritis  Certain cancers  Medications  Glucocorticoids (e.g., prednisone) used long-term  Proton pump inhibitors (PPIs)  Anticonvulsants  Chemotherapy or hormonal treatments for cancer  SSRIs (some evidence suggests increased risk)  Other Risk Factors  History of fractures from minor trauma  Early menopause or oophorectomy before age 45  Low testosterone in men  Eating disorders, especially anorexia nervosa  What You Can Do  Ensure adequate calcium and vitamin D intake.  Engage in regular weight-bearing and muscle-strengthening exercises.  Avoid smoking and limit alcohol.  Discuss bone density screening (DEXA scan) with your doctor if you're at risk. |
| **Is osteoporosis hereditary? My family members have it—am I at higher risk?** | Yes, osteoporosis can be hereditary, and having family members with the condition does increase your risk.  Why Family History Matters:  Genetics play a significant role in determining:  Your peak bone mass (how dense your bones are at their strongest),  The rate of bone loss as you age,  Your likelihood of fractures, especially in the spine and hip.  If a parent or sibling has osteoporosis—especially if they have experienced a fracture—you’re at higher risk.  Other Risk Factors to Consider:  Even with a family history, your overall risk depends on other factors like:  Age (risk increases with age),  Sex (women are at higher risk, especially after menopause),  Low body weight or small frame,  Calcium/vitamin D deficiency,  Sedentary lifestyle,  Smoking or excessive alcohol use,  Certain medications (e.g., corticosteroids).  What You Can Do:  Since you’re aware of a family history, it's smart to:  Talk to your doctor about your risk,  Get a bone density scan (DEXA) if recommended,  Ensure adequate calcium and vitamin D intake,  Exercise regularly, especially weight-bearing and resistance exercises,  Avoid smoking and limit alcohol. |
| **Does menopause increase the risk of osteoporosis?** | Yes, menopause significantly increases the risk of osteoporosis.  Why?  Menopause causes a drop in estrogen levels, and estrogen is crucial for maintaining bone density. Estrogen helps to:  Slow down the activity of osteoclasts (cells that break down bone)  Promote the activity of osteoblasts (cells that build bone)  When estrogen decreases after menopause:  Bone resorption increases  Bone formation cannot keep up  This results in loss of bone mass and increased fragility  Key facts:  Women can lose up to 20% of their bone density in the first 5–7 years after menopause  Osteoporosis is much more common in postmenopausal women  The risk of fractures (especially hip, spine, and wrist) increases significantly  Prevention strategies:  Calcium and vitamin D supplementation  Weight-bearing exercise  Bone density screening (DEXA scan)  Medications (e.g., bisphosphonates, hormone replacement therapy in selected cases) |
| **Is osteoporosis more common in women than men? Why?** | Yes, osteoporosis is more common in women than in men. Several biological and hormonal factors contribute to this difference:  1. Lower Peak Bone Mass in Women  Women generally achieve a lower peak bone mass than men by early adulthood. Since bone loss begins from this peak, women start with less reserve.  2. Menopause and Estrogen Deficiency  Estrogen plays a key role in maintaining bone density. After menopause, women experience a sharp decline in estrogen levels, which accelerates bone resorption and decreases bone formation, leading to rapid bone loss.  Men, in contrast, experience a more gradual decline in sex hormones (primarily testosterone, some of which is converted to estrogen), resulting in slower bone loss.  3. Longevity  Women live longer on average than men, increasing the time frame during which bone loss can accumulate and fractures may occur.  4. Body Composition Differences  Women typically have smaller and thinner bones than men, which makes them more susceptible to structural weakening as bone mass declines.  5. Pregnancy and Lactation (Contributing Factors)  These life stages can temporarily increase calcium demands and affect bone metabolism, especially if nutritional intake is inadequate.  Summary  These factors combine to make osteoporosis roughly four times more common in women than in men, particularly in postmenopausal women. Men can still develop osteoporosis, especially with risk factors like aging, hypogonadism, chronic illness, or corticosteroid use, but it is less prevalent. |
| **Does low calcium intake contribute to osteoporosis?** | Yes, low calcium intake is a well-established contributing factor to osteoporosis.  Here's how:  Calcium is essential for bone health: About 99% of the body's calcium is stored in bones and teeth. It's a critical component of bone mineralization.  Inadequate calcium intake impairs the body's ability to form strong bone structure and maintain bone density.  When dietary calcium is insufficient, the body pulls calcium from bones to maintain necessary blood levels, which leads to bone loss over time.  Low calcium intake during growth periods (childhood, adolescence) can prevent the attainment of peak bone mass — a major risk factor for osteoporosis later in life.  Evidence:  Numerous epidemiological studies have found associations between low calcium intake and increased risk of fractures.  Clinical guidelines for osteoporosis prevention emphasize adequate calcium (and vitamin D) intake as a primary preventive measure.  Recommendations:  Adults generally need 1,000–1,200 mg of calcium per day, depending on age and sex.  Calcium-rich sources include dairy products, leafy greens, calcium-fortified foods, and supplements if necessary.  Note:  While calcium is crucial, osteoporosis is multifactorial. Other factors like vitamin D deficiency, hormonal changes (especially estrogen deficiency in postmenopausal women), genetics, lack of physical activity, smoking, and alcohol use also play important roles. |
| **How does long-term use of steroids affect bone health?** | Long-term use of glucocorticoid steroids—such as prednisone, dexamethasone, or hydrocortisone—can have significant negative effects on bone health, primarily by disrupting bone remodeling processes. Here's a breakdown of how this occurs:  Mechanisms of Bone Damage  Inhibition of Osteoblast Function (Bone Formation)  Glucocorticoids:  Suppress osteoblastogenesis.  Increase apoptosis (cell death) of osteoblasts and osteocytes.  → Result: Reduced bone formation.  Stimulation of Osteoclast Activity (Bone Resorption)  Initially, steroids may increase osteoclast lifespan and activity, tipping the balance toward bone resorption.  Reduced Calcium Absorption and Increased Urinary Loss  Steroids reduce intestinal calcium absorption and increase renal calcium excretion, causing:  Secondary hyperparathyroidism.  Increased bone turnover and bone loss.  Suppression of Gonadal Hormones  Long-term steroid use can reduce estrogen/testosterone, which are protective against bone loss.  Myopathy and Immobility  Muscle weakness from steroid-induced myopathy leads to decreased physical activity, a known risk factor for osteoporosis.  Clinical Consequences  Glucocorticoid-Induced Osteoporosis (GIOP) is the most common form of secondary osteoporosis.  Fracture Risk: Especially high in the spine (vertebral fractures) and ribs, sometimes occurring even without trauma.  Bone loss is most rapid in the first 3–6 months of steroid therapy.  Risk Factors That Worsen Outcomes  Daily prednisone equivalent dose ≥ 5 mg for ≥ 3 months.  Older age, female sex (postmenopausal), low BMI.  History of fractures or family history of osteoporosis.  Smoking, alcohol use, poor nutrition, immobility.  Prevention and Management  Baseline Assessment:  Bone Mineral Density (BMD) test (DEXA scan) before or soon after initiation.  Lifestyle:  Weight-bearing exercise, smoking cessation, limiting alcohol, calcium (1,000–1,200 mg/day) and vitamin D (800–1,000 IU/day).  Pharmacologic Therapy:  Bisphosphonates (e.g., alendronate, risedronate).  Teriparatide or denosumab in high-risk individuals.  Hormone therapy (in select postmenopausal women or hypogonadal men).  Regular Monitoring:  Follow-up DEXA scans every 1–2 years.  Reassessment of fracture risk and medication adherence. |
| **What are signs and symptoms of osteoporosis?** | Osteoporosis is often called a "silent disease" because it typically develops without obvious symptoms until a fracture occurs. However, there are signs and symptoms that may suggest its presence or consequences:  Common Signs and Symptoms:  Fractures from Minor Trauma:  Especially of the hip, spine (vertebral compression fractures), or wrist  Often occur with minimal or no trauma  Loss of Height Over Time:  Due to compression fractures in the spine  Stooped Posture (Kyphosis):  "Dowager’s hump" caused by multiple vertebral fractures  Back Pain:  Can be sudden and severe if due to a vertebral fracture  Decreased Mobility or Function:  Often a consequence of fractures, leading to reduced activity levels  Other Clues Suggestive of Osteoporosis:  Family history of osteoporosis or fractures  History of long-term corticosteroid use  Early menopause or low testosterone in men  Nutritional deficiencies (calcium, vitamin D)  Low body weight or small frame  Smoking or excessive alcohol use  Certain medical conditions (e.g., rheumatoid arthritis, hyperthyroidism, chronic kidney disease)  Important Note:  Osteoporosis is usually diagnosed via bone mineral density (BMD) testing—commonly with dual-energy X-ray absorptiometry (DEXA or DXA scan)—before symptoms develop.  Let me know if you need a clinical diagnostic approach or patient education materials as well. |
| **Can osteoporosis cause pain?** | Yes, osteoporosis can cause pain, but not directly. The condition itself — which involves the loss of bone mass and deterioration of bone tissue — is often silent until a fracture occurs. Here's how osteoporosis can lead to pain:  1. Fractures  Osteoporotic bones are fragile and prone to fractures even with minimal trauma. Common sites include:  Vertebrae (spinal compression fractures): This is the most common cause of osteoporosis-related pain. These fractures can cause:  Sudden or chronic back pain  Loss of height  Kyphosis (forward curvature of the spine)  Hip fractures: Often very painful and typically require surgery.  Wrist or other long bone fractures  2. Muscle and Joint Strain  Chronic vertebral fractures can alter posture, leading to:  Muscle fatigue  Joint strain (especially in the back and neck)  Persistent aching or stiffness  3. Nerve Compression  In rare cases, collapsed vertebrae may impinge nerves, leading to:  Radicular pain (radiating from spine to limbs)  Numbness or weakness  Summary  While osteoporosis itself is not painful, the complications — especially fractures — are a major source of pain. Preventive care and early detection are key to reducing these risks. |
| **How do fractures occur in people with osteoporosis?** | Fractures in people with osteoporosis occur more easily due to the decreased bone mass and microarchitectural deterioration of bone tissue. Here's a breakdown of how and why they happen:  1. Weakened Bone Structure  Osteoporosis reduces both the density and quality of bone. Bones become porous, thin, and fragile, which significantly lowers their ability to withstand normal mechanical stress.  2. Low-Energy Trauma  Fractures often occur from minimal trauma, such as:  Falls from standing height (common cause)  Bending, twisting, or even coughing or sneezing (can cause spinal compression fractures)  3. Common Sites of Fracture  Due to biomechanical stress points and trabecular bone composition, fractures tend to occur at:  Vertebrae (spinal compression fractures) – due to axial loading  Hip (proximal femur) – often from a sideways fall  Wrist (distal radius) – usually from a fall on an outstretched hand  Humerus, pelvis, and ribs – less common but still significant  4. Silent Progression  Many osteoporosis-related fractures, particularly in the spine, may occur without trauma and without immediate symptoms—until cumulative damage causes height loss, kyphosis, or pain.  5. Fracture Cascade  Once a person with osteoporosis experiences a fracture, they are at higher risk for subsequent fractures due to:  Further deterioration of bone  Decreased mobility and balance  Fear of falling |
| **Topic: Diagnosis** | |
| **How is osteoporosis diagnosed?** | Osteoporosis is diagnosed using a combination of clinical assessment and imaging techniques. The primary goal is to evaluate bone density and assess fracture risk. Here's how it is typically done:  1. Bone Mineral Density (BMD) Testing  The gold standard for diagnosing osteoporosis is Dual-Energy X-ray Absorptiometry (DEXA or DXA), which measures bone density at the lumbar spine and hip.  T-score interpretation:  Normal: T-score ≥ -1.0  Osteopenia (low bone mass): T-score between -1.0 and -2.5  Osteoporosis: T-score ≤ -2.5  Severe osteoporosis: T-score ≤ -2.5 with one or more fragility fractures  2. Clinical History and Risk Assessment  Important components include:  Personal history of fragility fractures  Family history of osteoporosis  Risk factors such as:  Age (especially postmenopausal women and men > 70)  Smoking  Alcohol abuse  Long-term corticosteroid use  Low body weight  Secondary causes (e.g., rheumatoid arthritis, endocrine disorders)  Tools like the FRAX® calculator estimate the 10-year probability of a major osteoporotic fracture using clinical risk factors, with or without BMD input.  3. Laboratory Tests  Used to rule out secondary causes of osteoporosis or other metabolic bone diseases:  Calcium, phosphate, vitamin D levels  Parathyroid hormone (PTH)  Thyroid function tests  Renal and liver function  Serum protein electrophoresis (if multiple myeloma is suspected)  4. Vertebral Imaging  May be done in patients with height loss, back pain, or T-scores indicating osteopenia or osteoporosis. Vertebral fracture assessment (VFA) with lateral spine imaging can detect asymptomatic vertebral fractures. |
| **What is a DEXA scan and how does it help in diagnosing osteoporosis?** | A DEXA scan (short for Dual-Energy X-ray Absorptiometry) is a specialized imaging test used to measure bone mineral density (BMD). It is considered the gold standard for diagnosing osteoporosis, a condition characterized by low bone mass and structural deterioration of bone tissue, leading to increased fracture risk.  How a DEXA Scan Works  The scan uses two X-ray beams at different energy levels.  These beams pass through the bone, typically at the hip and spine, which are common fracture sites.  By measuring the absorption of each beam by the bone, the machine calculates bone density.  How It Helps in Diagnosing Osteoporosis  Quantifies Bone Density:  The result is given as a T-score, which compares the patient’s BMD to a healthy young adult reference population.  T-score ≥ -1.0: Normal  T-score between -1.0 and -2.5: Osteopenia (low bone mass)  T-score ≤ -2.5: Osteoporosis  Detects Risk of Fracture:  Lower bone density correlates with a higher risk of fractures.  Helps identify patients who would benefit from preventive treatment.  Monitors Treatment Effectiveness:  Repeated scans can evaluate the response to medications like bisphosphonates or hormone replacement therapy.  Evaluates Secondary Causes:  In some cases, abnormal results can prompt further evaluation for secondary causes of osteoporosis (e.g., glucocorticoid use, endocrine disorders).  Advantages  Non-invasive  Low radiation exposure  Quick (usually under 15 minutes)  Widely available  Summary  A DEXA scan is an essential diagnostic tool in assessing bone health, particularly for postmenopausal women, older adults, and those with risk factors for bone loss. By quantifying bone density, it plays a critical role in the diagnosis, risk stratification, and management of osteoporosis. |
| **At what age should I be screened for osteoporosis?** | The recommended age for osteoporosis screening depends on your sex, age, and risk factors. Here's a general guideline:  For Women:  Age 65 and older: Routine bone density screening is recommended.  Younger than 65: Screening is recommended if you have risk factors such as:  History of fractures  Family history of osteoporosis  Low body weight or being underweight  Smoking or heavy alcohol use  Use of certain medications (e.g., corticosteroids)  Conditions like rheumatoid arthritis or early menopause  For Men:  Age 70 and older: Screening is often recommended.  Ages 50–69: Screening is considered if there are risk factors similar to those listed above.  Test Used:  The DEXA (dual-energy X-ray absorptiometry) scan is the standard test used to assess bone mineral density.  If you're unsure about your risk level, a healthcare provider can help assess your need for screening using tools like FRAX (Fracture Risk Assessment Tool). |
| **What does a T-score mean in a bone density test?** | A T-score in a bone density test (typically a DEXA scan, or dual-energy X-ray absorptiometry) is a measure used to assess bone mineral density (BMD) and estimate the risk of fractures or osteoporosis.  What the T-score Represents:  The T-score compares your bone density to that of a healthy 30-year-old adult of the same sex (considered the peak bone mass age).  How to Interpret T-scores:  T-score Meaning Interpretation  ≥ -1.0 Normal bone density Low risk of fracture  -1.0 to -2.5 Low bone mass (osteopenia) Mild to moderate bone loss  ≤ -2.5 Osteoporosis High risk of fracture  ≤ -2.5 + fracture Severe osteoporosis (established) Very high risk, bone fragility present  Example:  A T-score of -0.8 means your bone density is slightly below the young adult reference but still considered normal.  A T-score of -2.7 indicates osteoporosis.  Clinical Use:  T-scores are most commonly used for postmenopausal women and men over 50 to guide decisions on prevention or treatment of osteoporosis.  Let me know if you’d like help interpreting a specific result or how this relates to treatment decisions. |
| **Topic: Prevention and treatment** | |
| **How can I prevent osteoporosis?** | Preventing osteoporosis involves a combination of lifestyle choices, nutrition, exercise, and medical awareness. Here are the most effective strategies:  1. Optimize Nutrition  Calcium: Adults typically need 1000–1200 mg/day.  Sources: Dairy products, leafy greens, fortified foods, almonds, sardines.  Vitamin D: Helps with calcium absorption.  Aim for 600–800 IU/day, possibly more in older adults.  Sources: Sunlight, fatty fish, fortified foods, or supplements.  2. Regular Weight-Bearing and Resistance Exercise  Weight-bearing: Walking, jogging, dancing, hiking.  Muscle-strengthening: Weightlifting, resistance bands, bodyweight exercises.  Aim for at least 30 minutes most days.  3. Lifestyle Modifications  Avoid smoking – it accelerates bone loss.  Limit alcohol – more than 2 drinks/day increases risk.  Limit caffeine – excessive intake may interfere with calcium absorption.  4. Monitor Risk Factors  Family history of osteoporosis or fractures  Early menopause or low estrogen/testosterone levels  Certain medications (e.g., corticosteroids, anticonvulsants)  Low body weight or history of eating disorders  5. Consider Medical Evaluation  Bone density testing (DEXA scan) for postmenopausal women, men over 70, or younger people with risk factors.  Discuss preventive medications (like bisphosphonates) if you're at high risk.  Summary  To prevent osteoporosis:  Eat calcium- and vitamin D-rich foods.  Exercise regularly (especially weight-bearing and resistance).  Avoid smoking and limit alcohol.  Assess personal risk and consider screening. |
| **What kind of exercises are beneficial for bone health?** | Exercises that are particularly beneficial for bone health are those that stimulate bone formation through mechanical stress. The most effective types fall into two main categories:  1. Weight-Bearing Exercises  These are activities where you work against gravity while staying upright. They help build and maintain bone density.  High-impact examples (greatest bone benefits):  Walking briskly  Jogging or running  Hiking  Dancing  Jumping rope  Stair climbing  Tennis or other racquet sports  Low-impact examples (good if you have joint issues or osteoporosis):  Walking  Low-impact aerobics  Elliptical training  2. Resistance (Strength) Training  Using muscle strength to resist force also helps strengthen bones by increasing muscle mass and stimulating bone growth.  Effective resistance exercises include:  Free weights (e.g., dumbbells)  Weight machines  Resistance bands  Bodyweight exercises (e.g., push-ups, squats, lunges)  3. Balance and Flexibility Exercises  These don't directly build bone, but they reduce fall risk, which is critical in preventing fractures.  Examples:  Tai chi  Yoga (especially weight-bearing poses)  Pilates  Balance-focused exercises  Frequency and Recommendations:  Weight-bearing and resistance: At least 3–5 days/week for weight-bearing, and 2–3 days/week for strength training.  Balance/flexibility: Ideally daily, especially for older adults.  Caution:  For individuals with osteoporosis or fractures, some high-impact or twisting exercises (like golf or sit-ups) may need to be avoided. Consulting a physician or physical therapist before starting a program is important. |
| **What dietary changes should I make to prevent or treat osteoporosis?** | To prevent or manage osteoporosis, your diet should focus on bone-supporting nutrients and lifestyle habits that optimize bone density. Here's a comprehensive approach:  Key Nutrients for Bone Health  1. Calcium  Daily Goal:  Adults 19–50: 1,000 mg/day  Women ≥51 and men ≥71: 1,200 mg/day  Sources:  Dairy: milk, yogurt, cheese  Leafy greens: kale, bok choy (but not spinach, which contains oxalates)  Fortified foods: plant-based milk, orange juice, cereals  Canned fish with bones: salmon, sardines  2. Vitamin D  Daily Goal:  Adults <70: 600 IU/day  Adults ≥70: 800 IU/day  Sources:  Sunlight (15–30 min several times/week)  Fatty fish: salmon, mackerel, tuna  Fortified foods: dairy, plant milks, cereals  Supplements (if needed)  3. Protein  Important for bone matrix and strength  Sources: lean meat, fish, eggs, legumes, nuts, dairy  Balance with calcium intake to avoid excessive calcium loss (especially with high animal protein diets)  4. Magnesium, Phosphorus, and Vitamin K  Found in whole grains, nuts, seeds, green vegetables  Limit These to Reduce Bone Loss  Excess salt: increases calcium excretion in urine  Caffeine: limit to <3 cups of coffee/day  Alcohol: limit to <1 drink/day (women), <2 (men)  Soda (esp. cola): linked to lower bone density  Diet Tips Summary  Nutrient Key Foods Notes  Calcium Dairy, leafy greens, fortified foods Aim for 2–4 servings/day  Vitamin D Fish, sun, fortified foods Consider supplements if low  Protein Meat, fish, legumes, dairy Avoid very high protein w/low calcium  Magnesium Nuts, whole grains, green veggies Supports calcium metabolism  Vitamin K Kale, broccoli, spinach Especially important in elderly  Optional: Supplements  If diet alone doesn’t meet your needs (especially Vitamin D or Calcium), supplements may be helpful — consult your doctor for personalized advice.  Lifestyle Tips (Beyond Diet)  Weight-bearing exercise: walking, dancing, strength training  Avoid smoking  Monitor bone density (DEXA scan) if at risk |
| **Do calcium and vitamin D supplements help in osteoporosis?** | Yes, calcium and vitamin D supplements can help in the prevention and management of osteoporosis, but their effectiveness depends on the context and individual patient characteristics.  1. Role in Bone Health  Calcium is a key component of bone; adequate intake is essential for maintaining bone mass.  Vitamin D enhances intestinal absorption of calcium and helps maintain proper calcium and phosphate levels for bone mineralization.  2. Supplementation in Osteoporosis  Prevention: Supplements may help prevent osteoporosis in individuals at risk (e.g., postmenopausal women, elderly) who have inadequate dietary intake.  Treatment: They are considered adjuncts, not standalone treatments. Anti-resorptive or anabolic agents (e.g., bisphosphonates, denosumab, teriparatide) are typically needed for confirmed osteoporosis.  3. Evidence Summary  Fracture risk reduction: The effect of calcium and vitamin D alone on fracture risk is modest. Combined supplementation shows some benefit in reducing hip and non-vertebral fractures, particularly in institutionalized elderly or those with deficiencies.  Meta-analyses have shown mixed results, with greater benefits in older adults with low baseline intake.  4. Recommended Doses  Calcium: 1000–1200 mg/day (from diet and supplements combined)  Vitamin D: 800–1000 IU/day for adults at risk of deficiency  5. Cautions  Excess calcium may be associated with cardiovascular risks and kidney stones.  Supplements should only be used to correct dietary deficiencies, not as blanket therapy.  Summary  Calcium and vitamin D supplementation is beneficial as part of a comprehensive osteoporosis strategy, especially in individuals with low intake or increased risk. However, they are not sufficient alone for treating established osteoporosis. |
| **What medications are available to treat osteoporosis?** | Osteoporosis treatment includes several classes of medications aimed at reducing bone resorption, promoting bone formation, or both. The choice of treatment depends on the severity of the disease, patient risk factors, and tolerability. Here are the main categories and commonly used medications:  1. Antiresorptive Agents  These medications slow down bone loss.  Bisphosphonates (first-line in many cases)  Alendronate (Fosamax)  Risedronate (Actonel)  Ibandronate (Boniva)  Zoledronic acid (Reclast)  Route: Oral or IV  Notes: Can cause gastrointestinal side effects; patients must remain upright after oral doses.  Selective Estrogen Receptor Modulators (SERMs)  Raloxifene (Evista)  Notes: Useful in postmenopausal women; reduces vertebral fracture risk, not non-vertebral.  Hormone Replacement Therapy (HRT)  Estrogen or Estrogen + Progestin  Notes: Generally used in women with menopausal symptoms; risk of cardiovascular events and cancers limits use.  Calcitonin  Salmon calcitonin (Miacalcin, Fortical)  Notes: Less commonly used; modest efficacy; available as nasal spray or injection.  2. Anabolic (Bone-Building) Agents  These promote bone formation.  Parathyroid Hormone Analogues  Teriparatide (Forteo)  Abaloparatide (Tymlos)  Notes: Daily subcutaneous injections; used for high fracture risk or failed other therapies; 2-year use limit.  Sclerostin Inhibitor  Romosozumab (Evenity)  Notes: Monthly injection for 12 months; has both anabolic and antiresorptive effects; possible cardiovascular risks.  3. RANK Ligand Inhibitor  Denosumab (Prolia)  Notes: Subcutaneous injection every 6 months; effective in reducing all major fracture types. Must monitor for rebound bone loss if discontinued.  Lifestyle and Supportive Measures  Calcium and Vitamin D supplementation  Weight-bearing exercise  Fall prevention strategies  Avoidance of smoking and excessive alcohol  Choosing a Therapy  Factors influencing choice:  Fracture risk (e.g., via FRAX)  T-score severity  Age and sex  Comorbidities (e.g., renal function)  Prior medication use  Tolerability and patient preferences |
| **How long do I need to take medication for osteoporosis?** | The duration of osteoporosis treatment depends on several factors, including the type of medication, your response to treatment, your risk of fracture, and your bone mineral density (BMD) results over time. Here's a general overview:  1. Bisphosphonates (e.g., alendronate, risedronate, zoledronic acid)  Typical duration: 3–5 years  After this period, many patients undergo a “drug holiday” if their fracture risk has decreased.  However, treatment may continue longer if you're still at high risk of fracture.  2. Denosumab (Prolia)  Continuous use is critical: This medication must be taken indefinitely (every 6 months) unless an alternative is ready to be started.  Stopping suddenly can lead to rapid bone loss and increased fracture risk.  3. Anabolic agents (e.g., teriparatide, abaloparatide, romosozumab)  Duration is limited: Typically used for 12–24 months.  Usually followed by antiresorptive treatment (like bisphosphonates) to maintain gains in bone density.  4. Hormone-related treatments (e.g., raloxifene, estrogen therapy)  Duration varies, often based on menopausal symptoms and risk factors.  Monitoring & Re-evaluation  Regular DXA scans (bone density tests) every 1–2 years are often used to monitor progress.  Your doctor may also monitor fracture risk, calcium/vitamin D levels, and renal function depending on the medication.  Summary  You might take osteoporosis medications for a few years to a lifetime, depending on your medication type and risk profile. Always consult your healthcare provider to tailor the treatment duration to your individual needs. |
| **Are there any side effects of osteoporosis treatments?** | Yes, treatments for osteoporosis can have side effects, depending on the type of medication or therapy used. Here's a breakdown of the main types of osteoporosis treatments and their potential side effects:  1. Bisphosphonates  Examples: Alendronate (Fosamax), Risedronate (Actonel), Ibandronate (Boniva), Zoledronic acid (Reclast)  Common Side Effects:  Gastrointestinal issues (e.g., heartburn, esophageal irritation with oral forms)  Muscle or joint pain  Flu-like symptoms (especially with IV zoledronic acid)  Rare but serious: osteonecrosis of the jaw, atypical femur fractures (with long-term use)  2. Denosumab (Prolia)  Mechanism: Monoclonal antibody that inhibits bone resorption  Side Effects:  Skin infections (e.g., cellulitis)  Hypocalcemia (especially in patients with kidney problems)  Rare: osteonecrosis of the jaw, atypical femoral fractures  Rebound effect: rapid bone loss and increased fracture risk if discontinued suddenly  3. Hormone-Related Therapy  Estrogen therapy / Hormone Replacement Therapy (HRT):  Risks: Increased risk of breast cancer, stroke, deep vein thrombosis (DVT), and cardiovascular disease  Selective Estrogen Receptor Modulators (SERMs) like Raloxifene:  Side Effects: Hot flashes, increased risk of blood clots  4. Anabolic Agents  Teriparatide (Forteo), Abaloparatide (Tymlos):  Side Effects:  Nausea, dizziness  Leg cramps  Rare: risk of osteosarcoma (in animal studies; hence limited to 2 years of use)  Romosozumab (Evenity):  Side Effects:  Joint pain  Injection site reactions  Rare: possible increased risk of cardiovascular events (stroke, heart attack)  5. Calcium and Vitamin D Supplements  Usually well-tolerated  Possible side effects: constipation, kidney stones (especially with high doses)  Monitoring and Management  Regular dental checkups (for jaw health)  Monitoring kidney function, calcium levels  Fracture risk assessment when discontinuing medications like denosumab  If you are considering or already taking osteoporosis medication, it's important to have a personalized risk-benefit discussion with your physician, especially if you have other health conditions. |
| **Can osteoporosis be reversed with treatment?** | Osteoporosis cannot typically be fully reversed, but it can be effectively managed and partially improved with treatment. The primary goals of osteoporosis treatment are to:  Prevent further bone loss  Increase bone strength  Reduce fracture risk  What Treatment Can Do:  Medications: Drugs like bisphosphonates, denosumab, teriparatide, abaloparatide, and romosozumab can slow bone loss or stimulate new bone formation.  Calcium and Vitamin D: Supplementation supports bone mineralization.  Lifestyle changes: Weight-bearing exercise, fall prevention, smoking cessation, and reduced alcohol intake can improve bone health.  Hormonal therapy: In certain cases, especially in postmenopausal women or men with low testosterone, hormone therapy may help.  Can Bone Density Improve?  Yes—especially with anabolic agents like teriparatide or romosozumab, which stimulate new bone formation. These can increase bone mineral density (BMD), sometimes significantly, but not usually to the level of someone without osteoporosis.  Key Point:  Osteoporosis treatment is about stabilizing or improving bone density and preventing fractures, not "curing" the disease in the traditional sense. With the right regimen, many people lead active lives and avoid serious complications.  Let me know if you want a comparison of different treatment options or guidance on interpreting bone density scans (DEXA). |
| **Topic: Prognosis** | |
| **Can I live a normal life with osteoporosis?** | Yes, you can live a normal and fulfilling life with osteoporosis — but it does require some lifestyle adjustments and ongoing management to reduce the risk of fractures and maintain your overall health. Here are key aspects to focus on:  1. Medication and Treatment  Follow your treatment plan: Medications like bisphosphonates, denosumab, or others can slow bone loss or even help rebuild bone.  Calcium and vitamin D: These are essential for bone health and should be taken as advised by your healthcare provider.  2. Physical Activity  Exercise regularly: Weight-bearing exercises (like walking or tai chi) and resistance training help maintain bone density and muscle strength.  Improve balance: Balance training (e.g., yoga, tai chi) reduces fall risk.  3. Fall Prevention  Home safety: Remove trip hazards, use non-slip mats, install grab bars, and ensure good lighting.  Vision checks: Keep your eyesight up to date to avoid falls.  4. Healthy Diet and Lifestyle  Eat well: A balanced diet rich in fruits, vegetables, lean protein, and whole grains supports overall health.  Avoid smoking and excessive alcohol: Both are linked to lower bone density.  5. Regular Monitoring  Bone density tests (DEXA scans): These help track progression and effectiveness of treatment.  Routine medical follow-up: Regular checkups help catch and manage complications early.  Mental and Social Well-Being  Stay socially active: Avoid isolation, which can negatively impact your mental health.  Manage anxiety or fear of falling: Cognitive behavioral therapy (CBT) or support groups can help.  In Summary  While osteoporosis increases the risk of fractures, especially in the spine, hips, and wrists, with the right care and precautions, most people can continue to enjoy an active and independent life. |

**Supplementary Table 2.** Model-generated responses from Gemini-2.5 Pro.

Full text of the 25 question–response pairs generated by Gemini-2.5 Pro under identical experimental conditions. Responses were evaluated for accuracy and comprehensiveness as described in the Methods.

| **Question** | **Gemini-2.5 Pro Response** |
| --- | --- |
| **Topic: Pathogenesis** | |
| **What is osteoporosis?** | Osteoporosis: When Bones Become Brittle  Osteoporosis is a common bone disease characterized by a decrease in bone mass and density, leading to weakened, porous bones that are more susceptible to fractures. Often dubbed a "silent disease," it typically progresses without any symptoms until a bone breaks, most commonly in the hip, spine, or wrist.  The underlying cause of osteoporosis is an imbalance in the body's natural bone remodeling process. Throughout life, old bone tissue is broken down (resorption) and replaced with new bone (formation). Osteoporosis occurs when the rate of bone resorption outpaces bone formation, resulting in a net loss of bone tissue.  While bone loss is a natural part of aging, certain factors can increase an individual's risk of developing osteoporosis. These include:  Age: The risk significantly increases with age, particularly after 50.  Gender: Women are at a higher risk, especially after menopause due to the decline in estrogen levels, a hormone crucial for bone health. However, men can also develop osteoporosis.  Family History: A family history of osteoporosis or fractures can predispose individuals to the condition.  Body Frame Size: Individuals with small, thin body frames tend to have a higher risk.  Hormone Levels: Low levels of estrogen in women (often due to menopause or surgical removal of ovaries) and low testosterone levels in men can contribute to bone loss. Overactive thyroid, parathyroid, or adrenal glands can also play a role.  Dietary Factors: A lifelong low intake of calcium and vitamin D, essential nutrients for bone health, increases risk. Eating disorders and gastrointestinal surgery can also impact nutrient absorption.  Lifestyle Choices: Smoking, excessive alcohol consumption, and a sedentary lifestyle with little to no weight-bearing exercise can weaken bones.  Medical Conditions: Certain conditions like rheumatoid arthritis, celiac disease, inflammatory bowel disease, kidney or liver disease, and some cancers are associated with an increased risk.  Medications: Long-term use of certain medications, such as corticosteroids (e.g., prednisone), some anti-seizure drugs, and certain cancer treatments, can negatively impact bone density.  Recognizing the Signs (Though Often Late)  In its early stages, osteoporosis usually doesn't cause any noticeable symptoms. However, as bones weaken, individuals may experience:  Back pain, potentially caused by a fractured or collapsed vertebra.  Loss of height over time.  A stooped posture.  A bone that breaks much more easily than expected, often from a minor fall or even mild stresses like bending or coughing.  Diagnosis and Treatment  Osteoporosis is typically diagnosed through a bone mineral density (BMD) test, most commonly a dual-energy X-ray absorptiometry (DXA or DEXA) scan. This painless test measures the density of bones, usually in the hip and spine, and compares it to that of a healthy young adult.  Treatment for osteoporosis focuses on slowing or stopping bone loss, preventing fractures, and managing pain. Treatment strategies often involve a combination of lifestyle modifications and medication:  Lifestyle Changes:  Diet: Ensuring adequate intake of calcium and vitamin D through diet and, if necessary, supplements.  Exercise: Regular weight-bearing exercises (like walking, jogging, or dancing) and muscle-strengthening exercises can help improve bone strength and balance.  Fall Prevention: Taking measures to reduce the risk of falls, such as removing household hazards and improving balance.  Avoiding Smoking and Limiting Alcohol: These habits are detrimental to bone health.  Medications:  Bisphosphonates: These are the most common medications prescribed to slow bone loss.  Denosumab: An injectable medication that reduces bone resorption.  Hormone-related therapies: Estrogen therapy may be considered for some postmenopausal women, though it comes with certain risks. Raloxifene is another option that mimics estrogen's beneficial effects on bone density.  Bone-building medications: For severe osteoporosis or when other treatments aren't effective enough, drugs like teriparatide, abaloparatide, or romosozumab may be prescribed to stimulate new bone formation.  Early detection and intervention are key to managing osteoporosis and reducing the risk of debilitating fractures. Individuals with risk factors should discuss bone health screening with their healthcare provider. |
| **What causes bone loss in osteoporosis?** | The Silent Thief: Unpacking the Causes of Bone Loss in Osteoporosis  Osteoporosis, a condition characterized by weakened and brittle bones, is a significant health concern, particularly for older adults. The underlying cause of this "silent thief" is an imbalance in the continuous process of bone remodeling, where old bone is removed and new bone is formed. When bone removal outpaces bone formation, density decreases, and the structural integrity of the skeleton is compromised, leading to an increased risk of fractures.  At the heart of bone remodeling are two key types of cells: osteoclasts, responsible for breaking down old or damaged bone (resorption), and osteoblasts, responsible for building new bone (formation). In healthy individuals, these processes are tightly coupled, maintaining bone mass and strength. However, in osteoporosis, this delicate balance is disrupted.  Several factors contribute to this detrimental imbalance:  Hormonal Changes, Especially Estrogen Deficiency: Estrogen plays a crucial role in maintaining bone health in both men and women, though its decline is most prominently associated with postmenopausal osteoporosis in women. Estrogen helps to regulate bone turnover by promoting the activity of osteoblasts (bone-building cells) and inhibiting the activity of osteoclasts (bone-resorbing cells). When estrogen levels drop, osteoclasts become more active and live longer, leading to increased bone resorption. At the same time, the rate of bone formation by osteoblasts may not keep pace, resulting in a net loss of bone. In men, testosterone is converted to estrogen, which also contributes to bone density, so low testosterone levels can also contribute to bone loss.  Aging: As people age, the bone remodeling process naturally shifts towards increased resorption and decreased formation. Older individuals may also experience reduced calcium absorption, vitamin D deficiency (essential for calcium absorption and bone health), and an increase in parathyroid hormone (PTH) levels, which can stimulate bone breakdown. The efficiency of osteoblasts to produce new bone also tends to decline with age.  Genetic Predisposition: Family history plays a role in determining peak bone mass (the maximum bone density achieved, usually by young adulthood) and susceptibility to osteoporosis. Variations in certain genes, such as those involved with vitamin D receptors or collagen production, can influence bone density and strength.  Lifestyle Factors:  Inadequate Calcium and Vitamin D Intake: Calcium is the primary mineral component of bone, and vitamin D is essential for its absorption. A lifelong deficiency in either can significantly increase the risk of osteoporosis.  Sedentary Lifestyle: Weight-bearing and muscle-strengthening exercises stimulate osteoblasts and help to maintain bone density. Lack of physical activity contributes to bone loss.  Smoking: Smoking has been shown to reduce bone mineral density by impairing the function of osteoblasts and reducing the body's ability to absorb calcium. It can also lead to earlier menopause in women.  Excessive Alcohol Consumption: Chronic heavy drinking can interfere with the balance of calcium and the production of hormones that protect bone, as well as affect the activity of bone-forming cells.  Certain Medications and Medical Conditions: Long-term use of some medications, such as glucocorticoids (e.g., prednisone) used to treat inflammatory conditions, can significantly weaken bones by increasing bone resorption and decreasing bone formation. Various medical conditions, including endocrine disorders (like hyperthyroidism or hyperparathyroidism), rheumatoid arthritis, celiac disease, inflammatory bowel disease, and certain cancers, can also contribute to bone loss.  In essence, bone loss in osteoporosis is a complex process resulting from an overactivity of bone-resorbing osteoclasts, an underactivity of bone-forming osteoblasts, or a combination of both. This imbalance is driven by a variety of interconnected factors ranging from hormonal shifts and the natural aging process to genetic predispositions and lifestyle choices. Understanding these causes is crucial for the prevention, early detection, and effective management of osteoporosis. |
| **How does osteoporosis affect the structure of bones?** | Osteoporosis: A Saboteur of Bone's Architectural Integrity  Osteoporosis doesn't just make bones weaker; it fundamentally alters their intricate structure, transforming them from resilient frameworks into fragile shells susceptible to fractures. This "silent disease" wreaks havoc on both the dense outer layer and the spongy inner core of bones.  To understand the impact of osteoporosis, it's essential to first appreciate the two main types of bone tissue:  Cortical (Compact) Bone: This is the dense, hard outer shell that forms the shaft of long bones and the exterior of other bones. It provides strength and protection.  Trabecular (Spongy or Cancellous) Bone: Found inside the cortical bone, particularly at the ends of long bones, in vertebrae, and in the pelvis, trabecular bone has a honeycomb-like or lattice structure. This network of interconnected plates and rods, called trabeculae, provides support while being lightweight and also houses bone marrow.  Osteoporosis insidiously degrades both these vital components:  Impact on Trabecular Bone:  Trabecular bone, with its higher surface area and metabolic activity, is often the first and most severely affected by osteoporosis. The structural damage includes:  Thinning of Trabeculae: The individual struts (trabeculae) that make up the spongy network become thinner and weaker.  Loss of Trabeculae and Connectivity: Entire trabecular elements can be lost, leading to fewer connections within the network. This loss of interconnectedness significantly compromises the bone's ability to distribute and withstand stress. Imagine a sturdy scaffold gradually having its supporting beams removed – it becomes far less stable.  Increased Intertrabecular Spaces: As trabeculae are lost, the spaces between them enlarge, making the bone more porous and less dense.  Shift from Plate-like to Rod-like Structures: Healthy trabecular bone often has a more plate-like structure, offering better mechanical support. In osteoporosis, these plates can be eroded and perforated, converting them into thinner, more fragile rod-like structures, which are mechanically inferior.  Impact on Cortical Bone:  While often considered more resistant, cortical bone is also significantly compromised by osteoporosis:  Cortical Thinning: The dense outer shell of the bone becomes thinner, reducing its overall strength and resistance to bending and twisting forces.  Increased Cortical Porosity: Even within the compact cortical bone, osteoporosis can lead to an increase in the number and size of microscopic pores and canals (like Haversian canals). This "trabecularization" of cortical bone reduces its density and structural integrity. Resorption cavities can form on the inner (endosteal) surface of the cortical bone, further thinning it from the inside out.  Overall Consequences of Structural Changes:  These microarchitectural and macroarchitectural changes have profound consequences:  Reduced Bone Mineral Density (BMD): The loss of bone tissue naturally leads to a decrease in BMD, which is a common diagnostic measure for osteoporosis.  Decreased Bone Mass: The overall amount of bone tissue is diminished.  Compromised Bone Strength and Quality: Beyond just density, the altered architecture means the remaining bone is of poorer quality and less able to resist fractures. The loss of connectivity in trabecular bone and the increased porosity of cortical bone make the entire skeletal structure significantly weaker and more brittle.  Increased Fracture Risk: This is the ultimate and most devastating consequence. Bones affected by osteoporosis can fracture with minimal trauma, such as a minor fall, a sneeze, or even just bending over. Common sites for osteoporotic fractures include the hip, spine, and wrist. Vertebral fractures can lead to a loss of height and a stooped posture (kyphosis).  In essence, osteoporosis systematically dismantles the architectural strength of bones from the inside out, leading to a skeleton that is dangerously fragile and prone to breaking under stresses it could once easily withstand.  Osteoporosis, meaning "porous bone," directly impacts the structural integrity of bones at both the microscopic and macroscopic levels. This deterioration leads to a decrease in bone strength and an increased susceptibility to fractures. Here's how the structure of bones is affected:  1. Reduced Bone Mineral Density (BMD):  Healthy bones are dense and strong. Osteoporosis causes a significant reduction in bone mineral density, meaning there's less bone tissue packed into the same volume. This loss of mass makes bones lighter, weaker, and more brittle. While BMD is a key measure, it doesn't tell the whole story; the changes in bone architecture are also crucial.  2. Deterioration of Bone Microarchitecture:  Bone tissue has two main types, and osteoporosis affects both:  Trabecular Bone (Spongy Bone): This is the inner, honeycomb-like network of bony struts (trabeculae) found particularly in vertebrae, the ends of long bones (like the femur at the hip), and the wrist. Healthy trabecular bone has a well-connected, dense lattice structure.  In osteoporosis:  Thinning of Trabeculae: The individual struts become thinner and weaker.  Loss of Trabeculae: Some trabeculae are completely lost, creating larger spaces within the bone.  Reduced Connectivity: The connections between trabeculae are diminished. Instead of a well-braced, plate-like structure, it can become more like a collection of disconnected, rod-like structures. This significantly compromises its ability to withstand compressive forces. For example, vertebral bodies, which are rich in trabecular bone, can collapse under normal body weight or minor stress, leading to vertebral compression fractures.  Cortical Bone (Compact Bone): This is the dense, hard outer shell of bones, making up about 80% of the skeleton. It provides much of the bone's strength, especially its resistance to bending and twisting forces.  In osteoporosis:  Cortical Thinning: The overall thickness of the cortical shell decreases.  Increased Porosity: The cortical bone itself becomes more porous. This happens due to the widening of existing Haversian canals (channels that carry blood vessels and nerves within the bone) and the creation of new resorption spaces. This "trabecularization" of cortical bone weakens its structural integrity.  Endocortical Resorption: Bone loss often occurs more rapidly on the inner surface (endosteal surface) of the cortical bone, leading to an expansion of the marrow cavity and further thinning of the cortex from the inside out.  3. Macroscopic Structural Changes and Consequences:  These microscopic changes translate into visible alterations in bone structure and overall skeletal health:  Increased Brittleness and Fragility: The most significant consequence is that bones break much more easily. Fractures can occur from minor falls, bumps, or even everyday activities like bending over or coughing. Common sites include the hip, spine, and wrist.  Vertebral Compression Fractures: As the trabecular bone within vertebrae weakens, the vertebrae can collapse or become wedge-shaped. This can lead to:  Loss of Height: Multiple compression fractures can cause a noticeable decrease in overall height.  Kyphosis (Dowager's Hump): A curving of the spine, often in the upper back, resulting in a stooped posture.  Back Pain: Acute or chronic pain due to fractures and altered spinal mechanics.  Changes in Bone Shape: While less dramatic than fractures, subtle changes in the geometry of bones can occur over time, further affecting their mechanical strength. For example, the thinning of the femoral neck at the hip significantly increases fracture risk.  In summary, osteoporosis doesn't just mean less bone; it means structurally compromised bone. The thinning and disconnection of trabeculae, coupled with the thinning and increased porosity of cortical bone, fundamentally alter the architecture of the skeleton, rendering it fragile and prone to breaking. |
| **Topic: Risk factor** | |
| **What increases my risk of developing osteoporosis?** | Understanding Your Risk for Osteoporosis  Osteoporosis, a condition characterized by weakened bones and an increased susceptibility to fractures, can be influenced by a variety of factors. Some of these are beyond your control, while others can be managed through lifestyle choices and medical attention.  Key Risk Factors Include:  Non-Modifiable Risk Factors:  Age: The risk of osteoporosis increases significantly with age as bone density naturally declines.  Sex: Women are at a much higher risk of developing osteoporosis than men, particularly after menopause due to the sharp decline in estrogen levels. However, men can also develop osteoporosis.  Family History: A family history of osteoporosis or fractures, especially a parental hip fracture, increases your risk.  Ethnicity: Individuals of White and Asian descent have a higher risk of developing osteoporosis.  Body Frame Size: People with small body frames and lower body weight may have less bone mass to draw from as they age, increasing their risk.  Previous Fractures: Having a history of one or more fragility fractures (fractures from a minor fall or injury) significantly increases the risk of future fractures.  Hormonal Factors:  Menopause: The decrease in estrogen levels during and after menopause is a primary driver of bone loss in women. Early menopause (before age 45) further elevates this risk.  Low Testosterone Levels: In men, low levels of testosterone can contribute to bone loss.  Hormonal Disorders: Conditions affecting the thyroid (like an overactive thyroid), parathyroid glands, or adrenal glands can lead to bone loss.  Lifestyle and Dietary Factors:  Low Calcium Intake: A lifelong lack of calcium plays a significant role in the development of osteoporosis. Calcium is essential for building and maintaining strong bones.  Vitamin D Deficiency: Vitamin D is crucial for calcium absorption. Insufficient levels can lead to weaker bones.  Sedentary Lifestyle: Lack of weight-bearing exercise and physical activity contributes to lower bone density.  Smoking: Tobacco use is detrimental to bone health and can accelerate bone loss.  Excessive Alcohol Consumption: Regularly drinking more than two alcoholic beverages a day can increase your risk of osteoporosis and fractures.  Eating Disorders: Conditions like anorexia nervosa and bulimia, which often involve severe food restriction and low body weight, can significantly weaken bones.  Low Body Mass Index (BMI): Being underweight (a BMI of 19 or less) is a risk factor.  Medical Conditions and Medications:  Certain Medical Conditions: Several health conditions can increase osteoporosis risk, including:  Rheumatoid arthritis and other inflammatory joint diseases.  Celiac disease and inflammatory bowel disease (Crohn's, ulcerative colitis), which can affect nutrient absorption.  Kidney or liver disease.  Certain cancers, such as multiple myeloma.  Conditions that cause prolonged immobility.  Diabetes.  Medications: Long-term use of certain medications can contribute to bone loss, including:  Corticosteroids (e.g., prednisone) used for conditions like asthma and arthritis.  Some medications used to treat seizures, depression, or cancer.  Proton pump inhibitors (used for acid reflux).  Certain hormonal treatments for breast or prostate cancer.  Gastrointestinal Surgery: Surgeries that reduce stomach size or remove parts of the intestine can limit nutrient absorption, including calcium.  It's important to discuss your individual risk factors with your doctor. They can assess your bone health and recommend preventive measures or treatments if necessary. These may include lifestyle modifications, dietary changes, and in some cases, medication to help strengthen your bones. |
| **Is osteoporosis hereditary? My family members have it—am I at higher risk?** | Osteoporosis and Heredity: Understanding Your Risk  Yes, osteoporosis has a significant hereditary component. If your family members have osteoporosis, you are indeed at a higher risk of developing the condition.  Genetics play a crucial role in determining peak bone mass, which is the maximum strength and density your bones achieve. This peak is usually reached in your late 20s. A lower peak bone mass can mean a higher likelihood of developing osteoporosis later in life. Studies on families and twins have shown that genetic factors contribute significantly to bone mineral density (BMD), a key indicator of osteoporosis. In fact, it's estimated that genetics may influence up to 75-85% of an individual's peak bone mass.  Family History as a Key Risk Factor  Having a parent or sibling with osteoporosis, particularly if your mother or father experienced a hip fracture, is a well-established risk factor for the disease. Research indicates that:  A parental history of any fracture is associated with an increased risk of any fracture in their children.  This risk is even more pronounced if a parent suffered a hip fracture. Studies have shown the risk of an osteoporotic fracture can increase by over 50% in this scenario.  The influence of family history on fracture risk can even be independent of bone mineral density, suggesting that other inherited factors related to bone quality or structure might also be at play.  Other Factors Influencing Osteoporosis Risk  While genetics are important, they are not the sole determinant. Osteoporosis is a multifactorial condition, meaning various other factors also contribute to its development. These include:  Age: The risk increases significantly with age as bone resorption (breakdown) naturally outpaces bone formation.  Sex: Women are much more likely to develop osteoporosis than men, especially after menopause due to the sharp decline in estrogen levels, a hormone crucial for bone health.  Race: Individuals of White or Asian descent are at the greatest risk.  Body Frame Size: People with small, thin body frames tend to have a higher risk because they may have less bone mass to draw from as they age.  Hormone Levels: Low estrogen levels in women (due to menopause, early menopause, or ovary removal) and low testosterone levels in men can weaken bones. Overactive thyroid, parathyroid, or adrenal glands can also contribute.  Lifestyle Choices:  Low Calcium and Vitamin D Intake: These nutrients are essential for building and maintaining strong bones.  Sedentary Lifestyle: Lack of weight-bearing exercise can lead to weaker bones.  Smoking: Smoking can reduce bone density.  Excessive Alcohol Consumption: Heavy alcohol use can negatively impact bone health.  Medical Conditions and Medications: Certain conditions like celiac disease, inflammatory bowel disease, kidney or liver disease, rheumatoid arthritis, and some cancers can increase risk. Long-term use of certain medications, such as corticosteroids, can also contribute to bone loss.  Previous Fractures: A history of fractures, especially fragility fractures (those occurring from a minor fall or injury), can indicate underlying bone weakness.  What This Means for You  Given your family history of osteoporosis, it is advisable to discuss your risk with your healthcare provider. They can help assess your overall risk by considering your family history along with other relevant factors. They may recommend:  Bone Mineral Density (BMD) testing: This is the primary way to diagnose osteoporosis and assess your fracture risk.  Lifestyle modifications: This may include dietary changes to ensure adequate calcium and vitamin D intake, engaging in regular weight-bearing and muscle-strengthening exercises, quitting smoking, and limiting alcohol consumption.  Preventive medications: In some cases, medication may be recommended to help preserve bone density.  Understanding your genetic predisposition allows you to be proactive about your bone health and take steps to minimize your risk of developing osteoporosis and related fractures. |
| **Does menopause increase the risk of osteoporosis?** | Menopause Significantly Increases Osteoporosis Risk Due to Estrogen Decline  Yes, menopause markedly increases a woman's risk of developing osteoporosis. This heightened risk is primarily due to the significant decrease in estrogen levels that occurs during and after menopause. Estrogen plays a crucial role in maintaining bone density by regulating the continuous process of bone remodeling – the breakdown of old bone and formation of new bone.  As estrogen levels decline with menopause, bone breakdown (resorption) outpaces bone formation. This imbalance leads to a loss of bone mass and density, making bones weaker, more brittle, and susceptible to fractures.  Key points regarding menopause and osteoporosis risk:  Accelerated Bone Loss: Women can lose a significant percentage of their bone density in the first few years after menopause. Some studies indicate a loss of up to 10-20% of bone mass during this period.  Increased Fracture Risk: The reduction in bone density directly translates to a higher likelihood of fractures, particularly in the hip, spine, and wrist.  Early Menopause: Women who experience early menopause (before age 45), either naturally or due to surgical removal of the ovaries, face an even greater risk of osteoporosis because they spend more years with low estrogen levels.  "Silent Disease": Osteoporosis often progresses without symptoms until a fracture occurs, which is why it's sometimes called a "silent disease."  While menopause is a primary risk factor, other factors can also contribute to osteoporosis, including genetics, lifestyle choices (such as diet, exercise, smoking, and alcohol consumption), and certain medical conditions or medications.  Women approaching or experiencing menopause are encouraged to discuss their bone health with their healthcare providers. Bone density testing can help assess risk, and various strategies, including lifestyle modifications and medications, are available to help prevent and manage osteoporosis. |
| **Is osteoporosis more common in women than men? Why?** | Osteoporosis: A Condition More Prevalent in Women  Osteoporosis, a condition characterized by weakened bones and an increased risk of fractures, is significantly more common in women than in men. Several biological and physiological factors contribute to this disparity.  Key Reasons for Higher Prevalence in Women:  Hormonal Changes: The most prominent factor is the sharp decline in estrogen levels that women experience during and after menopause. Estrogen plays a vital role in maintaining bone density by inhibiting bone resorption (the breakdown of old bone) and promoting bone formation. When estrogen levels drop, bone loss accelerates.  Bone Structure and Peak Bone Mass: Women generally have smaller and thinner bones than men. They also tend to reach a lower peak bone mass – the maximum strength and density bones achieve, usually in early adulthood. A lower starting point means that age-related bone loss can lead to osteoporosis more quickly.  Longevity: On average, women live longer than men. Since bone loss is a natural part of aging, the extended lifespan provides more time for bone density to decrease to osteoporotic levels.  Pregnancy and Breastfeeding: During pregnancy and while breastfeeding, a woman's body has increased calcium demands to support the developing baby. If dietary calcium intake is insufficient, the body may draw calcium from the mother's bones, potentially leading to a temporary decrease in bone density. While bone mass is often regained after breastfeeding, it can be a contributing factor for some women.  While men can and do develop osteoporosis, particularly in older age or due to secondary causes like certain medications or medical conditions, the confluence of these factors makes women inherently more susceptible to developing the condition. Early awareness, adequate calcium and vitamin D intake, regular weight-bearing exercise, and consultation with healthcare providers for risk assessment and management are crucial for both sexes, but especially important for women. |
| **Does low calcium intake contribute to osteoporosis?** | Yes, low calcium intake significantly contributes to osteoporosis. Here's a breakdown of why:  Calcium is essential for bone health: Bones are living tissues that are constantly being broken down and rebuilt. Calcium is a primary building block of bone, providing its strength and density. About 99% of the body's calcium is stored in the bones and teeth.  The body's calcium "bank": If you don't consume enough calcium through your diet, your body will draw the calcium it needs for other vital functions (like nerve transmission, muscle function, and blood clotting) from your bones. This is like making a withdrawal from a "calcium bank."  Decreased bone density: Over time, if these "withdrawals" consistently exceed "deposits" (from dietary calcium), your bones will lose density and become weaker and more porous. This condition is known as osteopenia.  Osteoporosis development: If bone loss continues, osteopenia can progress to osteoporosis. Osteoporosis is a disease characterized by fragile and brittle bones, making them highly susceptible to fractures, even from minor stresses like coughing or bending over.  Lifelong impact: A lifelong lack of calcium plays a crucial role in the development of osteoporosis. Insufficient calcium intake contributes to diminished bone density, earlier bone loss, and an increased risk of fractures as you age.  Varying needs: Calcium requirements change throughout life. They are particularly high during adolescence when peak bone mass is being built, and for older adults (especially postmenopausal women) due to hormonal changes and decreased calcium absorption.  While low calcium intake is a major risk factor, it's important to note that other factors also contribute to osteoporosis, including vitamin D deficiency (vitamin D is essential for calcium absorption), age, sex, family history, hormone levels, certain medical conditions, and lifestyle choices like smoking and excessive alcohol consumption.  Therefore, ensuring adequate calcium intake throughout life, along with sufficient vitamin D and a healthy lifestyle, is crucial for preventing osteoporosis. |
| **How does long-term use of steroids affect bone health?** | Long-Term Steroid Use Takes a Toll on Bone Health, Increasing Fracture Risk  Long-term use of corticosteroid medications, often prescribed for a wide range of inflammatory and autoimmune conditions, can significantly compromise bone health, leading to a condition known as steroid-induced osteoporosis and a heightened risk of debilitating fractures.  The detrimental effects of prolonged steroid use on the skeletal system are multifaceted. These medications interfere with the natural bone remodeling process, tipping the balance towards excessive bone breakdown and insufficient new bone formation. Specifically, corticosteroids:  Reduce Calcium Absorption: They diminish the body's ability to absorb calcium from the intestines, a mineral crucial for building and maintaining strong bones.  Increase Calcium Excretion: Steroids promote the loss of calcium through the kidneys.  Inhibit Bone Formation: They directly suppress the activity of osteoblasts, the cells responsible for creating new bone tissue.  Enhance Bone Resorption: Conversely, they can increase the activity and lifespan of osteoclasts, the cells that break down old bone.  Affect Sex Hormones: Corticosteroids can lower levels of sex hormones like estrogen and testosterone, which play a vital role in preserving bone density in both women and men.  This disruption in bone metabolism leads to a progressive loss of bone mineral density and a deterioration of bone microarchitecture, making bones weaker, more brittle, and susceptible to fractures. The bone loss can be surprisingly rapid, particularly within the first few months of initiating steroid therapy. Even relatively low daily doses (e.g., 2.5 mg to 7.5 mg of prednisolone or its equivalent) taken for more than three months can elevate fracture risk. The spine and ribs are commonly affected sites for fractures in individuals on long-term steroids.  Beyond osteoporosis, another serious, albeit less common, complication of high-dose or prolonged steroid use is avascular necrosis (AVN), also known as osteonecrosis. This condition occurs when the blood supply to a portion of bone is disrupted, leading to bone tissue death and potential collapse of the affected joint, most frequently the hip.  Several factors can exacerbate the risk of steroid-induced bone damage. These include:  Dose and Duration of Steroid Therapy: Higher doses and longer treatment periods significantly increase the risk.  Age: Older individuals and very young children (under 15) are more vulnerable.  Post-menopausal Status: Women who have gone through menopause experience accelerated bone loss, which is compounded by steroid use.  Low Body Weight: Individuals with a lower body mass may have less bone density to begin with.  Underlying Medical Conditions: Diseases like rheumatoid arthritis, inflammatory bowel disease (IBD), and chronic obstructive pulmonary disease (COPD) that often necessitate steroid treatment can independently contribute to bone loss.  Lifestyle Factors: Smoking, excessive alcohol consumption, and a sedentary lifestyle can further compromise bone health.  Pre-existing Low Bone Density or Previous Fractures: These indicate an already weakened skeletal system.  Fortunately, steps can be taken to mitigate the adverse effects of long-term steroid use on bones. Healthcare providers aim to use the lowest effective steroid dose for the shortest possible duration. Localized steroid treatments, such as inhalers or joint injections, are generally preferred over systemic (oral or intravenous) administration when feasible, as they have a lower risk of systemic side effects, including bone loss.  For individuals on long-term steroid therapy, preventative measures are crucial. These often include:  Calcium and Vitamin D Supplementation: Ensuring adequate intake of these essential nutrients is fundamental.  Lifestyle Modifications: Engaging in regular weight-bearing and muscle-strengthening exercises, quitting smoking, and limiting alcohol intake are highly recommended.  Bone Density Monitoring: Regular dual-energy X-ray absorptiometry (DXA) scans can help track bone density and assess fracture risk.  Pharmacological Intervention: In many cases, particularly for those at high risk or with established bone loss, doctors may prescribe medications to protect bones. Bisphosphonates are a common first-line treatment, with other options including denosumab and teriparatide.  Patients requiring long-term steroid treatment should have an open discussion with their healthcare provider about bone health to establish an appropriate monitoring and management plan. Early intervention can significantly reduce the risk of osteoporosis and fractures, preserving mobility and quality of life. |
| **What are signs and symptoms of Osteoporosis?** | Osteoporosis: Often a Silent Thief of Bone Strength, Revealing Itself Through Fractures and Postural Changes  Osteoporosis, a condition characterized by weakened and brittle bones, often progresses silently in its early stages, exhibiting no obvious signs or symptoms. Many individuals remain unaware they have the condition until a bone breaks unexpectedly. However, as bone density diminishes, certain indicators may emerge.  Later-Stage Signs and Symptoms:  Once osteoporosis has significantly weakened bones, the following signs and symptoms may become apparent:  Back pain: This can be sudden and severe, often caused by a fractured or collapsed vertebra in the spine.  Loss of height over time: Multiple vertebral compression fractures can lead to a noticeable decrease in overall height.  Stooped posture (Kyphosis): The collapse of vertebrae can cause the spine to curve forward, resulting in a hunched-over appearance, sometimes referred to as a "dowager's hump."  Bones that fracture easily (Fragility Fractures): This is a hallmark of osteoporosis. Fractures can occur with minimal trauma, such as from a minor fall, bending over, lifting an object, coughing, or even sneezing. Common sites for these fractures include the hip, wrist, and spine.  Shortness of breath: In cases where vertebral fractures are severe, the compression of the spinal column can reduce lung capacity, leading to shortness of breath.  Lower back pain: Persistent or new lower back pain can also be an indicator.  Subtle or Less Common Potential Indicators:  While not definitive and potentially attributable to other causes, some sources suggest earlier or less direct signs that might warrant investigation, especially if risk factors for osteoporosis are present:  Receding gums: Bone loss in the jaw could potentially lead to receding gums.  Weakened grip strength: Some studies have linked lower grip strength to lower bone mineral density.  Brittle fingernails: While many factors can affect nail health, some suggest a possible link to underlying bone health.  It's crucial to note that these subtle signs are not diagnostic of osteoporosis on their own. Diagnosis is typically confirmed through a bone mineral density (BMD) test.  Individuals concerned about osteoporosis, particularly those with risk factors such as advanced age, family history, low body weight, certain medical conditions, or long-term use of specific medications, should consult a healthcare professional for assessment and appropriate screening. Early detection and intervention can help manage the condition and reduce the risk of debilitating fractures. |
| **Can osteoporosis cause pain?** | Yes, osteoporosis can cause pain, but typically not in its early stages. Osteoporosis is often called a "silent disease" because bone loss can occur without any symptoms.  Pain related to osteoporosis usually arises when the condition leads to:  Fractures: This is the most common cause of pain in people with osteoporosis. Weakened bones can break (fracture) much more easily than healthy bones, sometimes from minor falls, bumps, or even everyday activities like bending over or coughing. Common sites for osteoporotic fractures include the spine, hip, and wrist. These fractures can cause sudden, severe pain.  Collapsed Vertebrae: Osteoporosis can cause the bones in the spine (vertebrae) to weaken and collapse. This is a type of fracture often referred to as a compression fracture. It can lead to back pain, which may be sudden and severe or develop gradually. Over time, multiple vertebral fractures can cause a loss of height and a stooped posture, which may also contribute to chronic back pain.  Microfractures: Some individuals may experience pain from tiny, almost undetectable fractures in the bones as they become thinner.  Structural Changes: As vertebrae collapse and the spine curves, it can put a strain on muscles and ligaments, leading to chronic pain. Sometimes, ribs may end up resting on the pelvic bone due to severe spinal curvature, causing significant discomfort.  It's important to note that some people with osteoporosis may not experience significant pain even with vertebral fractures, as these can sometimes occur gradually and without acute symptoms.  In summary, while osteoporosis itself isn't inherently painful, the consequences of the disease, particularly fractures and changes in the spine, can cause significant acute and chronic pain. |
| **How do fractures occur in people with osteoporosis?** | Osteoporosis: The Silent Culprit Behind Brittle Bones and Fractures  Fractures in individuals with osteoporosis occur because the disease fundamentally weakens bones, making them porous, brittle, and far more susceptible to breaking. This deterioration means that even minor stresses, which a healthy bone could easily withstand, can lead to significant fractures.  Osteoporosis, often dubbed a "silent disease," develops as bone mineral density and bone mass decrease, and the structural integrity of bone tissue (its microarchitecture) deteriorates. Healthy bone is a dynamic, living tissue that is constantly being broken down and rebuilt in a process called remodeling. In osteoporosis, this balance is disrupted: either bone breakdown outpaces bone formation, or bone formation is insufficient. This results in bones that are less dense and weaker.  The inner structure of a healthy bone resembles a dense honeycomb. In an osteoporotic bone, these "honeycomb" spaces become larger, and the "walls" of the honeycomb (the trabeculae) become thinner and may even break down. The outer layer of the bone, known as cortical bone, also thins and becomes more porous. This overall loss of bone mass and structural integrity is what renders the bones fragile.  Consequently, fractures in people with osteoporosis, often termed "fragility fractures," can happen in several ways:  Low-Impact Trauma: Everyday incidents like a simple fall from a standing height or less, tripping, or even a sudden twist or bump can cause bones to break. These are situations where a person with healthy bones would likely not sustain a fracture.  Spontaneous Fractures: In severe cases of osteoporosis, fractures can occur with minimal or no apparent trauma. Activities as innocuous as coughing, sneezing, bending over to pick something up, or even just the stress of supporting one's own body weight can lead to a fracture, particularly in the spine (vertebral compression fractures).  The most common sites for osteoporotic fractures include:  The Hip: Often resulting from a fall, hip fractures can lead to significant disability and complications.  The Spine (Vertebrae): These can occur without a fall and may result in back pain, loss of height, and a stooped posture (kyphosis). Multiple vertebral fractures can significantly impact quality of life.  The Wrist: Typically occurs when someone tries to break a fall with an outstretched hand.  In essence, osteoporosis compromises the bone's ability to absorb impact and stress. The diminished quantity and quality of bone tissue mean that the threshold for fracture is significantly lowered, making individuals vulnerable to breaks during routine activities or minor accidents. |
| **Topic: Diagnosis** | |
| **How is osteoporosis diagnosed?** | Diagnosing Osteoporosis: A Multi-Faceted Approach  Osteoporosis, a condition characterized by weakened bones and an increased risk of fractures, is diagnosed through a combination of methods, with bone mineral density (BMD) testing being the cornerstone.  The most widely used and gold-standard test for measuring BMD is Dual-energy X-ray absorptiometry (DXA or DEXA scan). This non-invasive and painless procedure uses low-dose X-rays to measure the density of bones, typically at the hip and spine. These areas are chosen as they are common sites for osteoporotic fractures.  The results of a DXA scan are reported using T-scores and Z-scores:  T-score: This score compares an individual's BMD to that of a healthy young adult of the same sex. It is the primary score used for diagnosing osteoporosis in postmenopausal women and men aged 50 and older.  A T-score of -1.0 or above is considered normal bone density.  A T-score between -1.0 and -2.5 indicates low bone mass, often referred to as osteopenia. While not osteoporosis, it signifies a higher risk of developing the condition.  A T-score of -2.5 or below is diagnostic of osteoporosis.  Z-score: This score compares an individual's BMD to that of an average person of the same age, sex, and sometimes ethnicity. Z-scores are more commonly used for premenopausal women, men under 50, and children. A Z-score significantly lower than average may prompt further investigation for underlying causes of bone loss.  While BMD testing is central to diagnosis, healthcare providers also consider other crucial factors:  Fracture History: A history of fragility fractures (fractures that occur from a minor fall or with minimal trauma) is a strong indicator of osteoporosis, sometimes even regardless of the T-score.  Risk Factor Assessment: Clinicians evaluate various risk factors that can contribute to bone loss and increased fracture risk. These include:  Age: Bone density naturally decreases with age.  Sex: Women, particularly postmenopausal women, are at higher risk.  Family History: A family history of osteoporosis or hip fractures can increase risk.  Lifestyle Factors: Smoking, excessive alcohol intake, low calcium and vitamin D intake, and a sedentary lifestyle contribute to bone loss.  Medical Conditions: Certain conditions like rheumatoid arthritis, celiac disease, hyperthyroidism, and hyperparathyroidism can affect bone health.  Medications: Long-term use of certain medications, such as corticosteroids (e.g., prednisone), can lead to bone loss.  Clinical Examination: This may include measuring height to check for loss, which can indicate vertebral fractures.  Fracture Risk Assessment Tools (e.g., FRAX): These tools integrate BMD results with other clinical risk factors to estimate an individual's 10-year probability of major osteoporotic fractures (hip, spine, forearm, or humerus) and hip fracture specifically. This helps guide treatment decisions, especially in individuals with osteopenia.  In some cases, particularly if secondary causes of osteoporosis are suspected, blood and urine tests may be performed to check for underlying conditions, vitamin D levels, calcium levels, and markers of bone turnover.  In summary, the diagnosis of osteoporosis is a comprehensive process that relies heavily on DXA scan results (T-scores) but also incorporates a thorough evaluation of an individual's fracture history, risk factors, and overall clinical picture to accurately assess bone health and guide appropriate management strategies. |
| **What is a DEXA scan and how does it help in diagnosing osteoporosis?** | DEXA Scan: A Key Tool in Diagnosing Osteoporosis  A DEXA (Dual-Energy X-ray Absorptiometry) scan is a non-invasive and painless imaging test that measures bone mineral density (BMD). It is considered the gold standard for diagnosing osteoporosis, a condition characterized by weakened bones that are more susceptible to fractures.  How DEXA Scans Work:  The procedure uses two low-dose X-ray beams with different energy levels that are passed through the bones. The amount of X-rays that pass through the bone is measured, allowing a calculation of bone density. The denser the bone, the fewer X-rays pass through. Commonly scanned areas include the hip, spine, and sometimes the forearm, as these are common sites for osteoporotic fractures. The radiation exposure from a DEXA scan is very low, significantly less than a standard chest X-ray.  Diagnosing Osteoporosis with DEXA:  The results of a DEXA scan are reported primarily as a T-score and sometimes a Z-score.  T-score: This is the main score used to diagnose osteoporosis in postmenopausal women and men aged 50 and over. It compares an individual's BMD to the average BMD of a healthy young adult of the same sex.  Normal: A T-score of -1.0 or above.  Osteopenia (low bone mass): A T-score between -1.0 and -2.5. This indicates bone density that is lower than normal but not yet at the level of osteoporosis.  Osteoporosis: A T-score of -2.5 or below. This signifies significantly low bone density and a high risk of fracture.  Severe Osteoporosis: A T-score of -2.5 or below along with a history of one or more fragility fractures (fractures that occur from a minor fall or injury).  Z-score: This score compares an individual's BMD to the average BMD of people of the same age, sex, and ethnicity. While not the primary diagnostic tool for osteoporosis in older adults, a Z-score that is significantly lower than average (e.g., -2.0 or lower) may suggest that factors other than age-related bone loss are contributing to low bone density and might warrant further investigation for secondary causes of osteoporosis. It is more commonly used for children, premenopausal women, and men under 50.  Why DEXA Scans are Important for Osteoporosis:  Early Detection: Osteoporosis is often a "silent" disease, meaning it typically has no symptoms until a fracture occurs. DEXA scans can detect low bone density before a fracture happens, allowing for early intervention.  Risk Assessment: The T-score helps to quantify an individual's risk of future fractures. This information is crucial for making decisions about treatment and lifestyle modifications.  Monitoring Treatment: DEXA scans can be repeated over time to monitor changes in bone density and assess the effectiveness of osteoporosis treatments.  Guiding Treatment Decisions: The results, along with other risk factors, help healthcare providers determine the most appropriate course of action, which may include lifestyle changes (like diet and exercise), medication, or other therapies to strengthen bones and reduce fracture risk.  In summary, a DEXA scan is a vital diagnostic tool that provides a quantitative measure of bone strength. By comparing an individual's bone density to established norms, it allows for the accurate diagnosis of osteoporosis and osteopenia, helps predict fracture risk, and guides preventative and therapeutic strategies. |
| **At what age should I be screened for osteoporosis?** | Osteoporosis Screening: When Should You Be Checked in the Netherlands?  There's no single age for everyone to start osteoporosis screening. Instead, Dutch guidelines, supported by international consensus, recommend a risk-based approach. Generally, screening becomes more relevant from the age of 50, particularly if certain risk factors are present.  Key Recommendations in the Netherlands:  Individuals aged 50 and older who have had a recent fracture: A bone density scan (DEXA scan) is strongly recommended.  Individuals aged 60 and older with risk factors for osteoporosis or concerns about bone health: Screening, often using a risk assessment tool or a DEXA scan, is advised.  Individuals aged 40 and older with specific high-risk factors: This includes those who have used systemic corticosteroids (like prednisone) for three months or more, or have had four or more steroid courses in a year.  For those younger than 50, routine screening for osteoporosis is not standard practice in the Netherlands unless there are significant risk factors or a history of unexplained fractures. If you are younger than 50 and have concerns, it's important to discuss these with your doctor.  What are the risk factors that might lead to earlier screening?  Several factors can increase your risk of developing osteoporosis and may prompt your doctor to recommend earlier or more frequent screening. These include:  Previous fracture: Especially a fracture that occurred with minor trauma.  Family history of osteoporosis or hip fractures.  Low body weight or a low Body Mass Index (BMI).  Certain medical conditions: Such as rheumatoid arthritis, celiac disease (and other malabsorption disorders), hyperthyroidism, hyperparathyroidism, and conditions leading to prolonged immobility.  Early menopause (before age 45) or low levels of sex hormones (e.g., low testosterone in men).  Long-term use of certain medications: Besides corticosteroids, these can include some anti-epileptic drugs and others that affect bone density.  Lifestyle factors: Including smoking, excessive alcohol consumption, low calcium intake, and vitamin D deficiency (often due to insufficient sun exposure or diet).  Significant height loss.  In summary:  While there isn't a universal screening age, individuals in the Netherlands should be particularly mindful of their bone health from age 50. If you have had a recent fracture, are over 60 with risk factors, or have specific high-risk conditions like long-term steroid use (even from age 40), discussing osteoporosis screening with your GP (huisarts) is recommended. They can assess your individual risk profile and determine if a bone density measurement (DEXA scan) is appropriate for you. |
| **What does a T-score mean in a bone density test?** | In a bone density test, a T-score is a standard measure that compares your bone mineral density (BMD) to the average BMD of a healthy young adult of the same sex. This comparison helps assess your bone health and your risk of fracture.  Specifically, the T-score indicates how many units—called standard deviations (SD)—your bone density is above or below the average for a healthy 30-year-old adult.  Here's a general interpretation of T-scores as defined by the World Health Organization (WHO):  T-score of -1.0 or above: Your bone density is considered normal.  T-score between -1.0 and -2.5: Your bone density is below normal and is classified as osteopenia (low bone mass). This indicates a higher risk of developing osteoporosis.  T-score of -2.5 or below: Your bone density is significantly low and is classified as osteoporosis. This means you have a much higher risk of fractures.  Essentially, the more negative the T-score, the lower your bone density and the higher your risk for fractures. For example, a T-score of -3.0 indicates more severe osteoporosis than a T-score of -2.5. Conversely, a positive T-score means your bones are denser (stronger) than the average young adult.  Doctors use the T-score, along with other risk factors, to determine if treatment is needed to help protect your bones. |
| **Topic: Prevention and treatment** | |
| **How can I prevent osteoporosis?** | Building Strong Bones: A Guide to Preventing Osteoporosis  Osteoporosis, a condition characterized by weakened and brittle bones, can lead to an increased risk of fractures. While it often affects older adults, the foundation for strong bones is built throughout life. Fortunately, there are numerous proactive steps you can take to prevent osteoporosis and maintain skeletal health.  Key Prevention Strategies:  1. Ensure Adequate Calcium and Vitamin D Intake:  Calcium: This mineral is essential for building and maintaining strong bones.  Dietary Sources: Include calcium-rich foods in your diet such as dairy products (milk, yogurt, cheese), leafy green vegetables (kale, broccoli, bok choy), canned fish with edible bones (sardines, salmon), tofu, and calcium-fortified foods and beverages (juices, cereals, plant-based milks).  Recommended Daily Allowance (RDA):  Adults 19-50 years & Men 51-70 years: 1,000 mg  Women 51+ years & Men 71+ years: 1,200 mg  Supplements: If dietary intake is insufficient, consult your doctor about calcium supplements. It's generally recommended to take them in smaller doses (500-600 mg at a time) and often combined with vitamin D for better absorption.  Vitamin D: This vitamin plays a crucial role in helping your body absorb calcium.  Sources: Sunlight exposure (your body produces vitamin D when your skin is exposed to sunlight), fatty fish (salmon, mackerel, tuna), egg yolks, and fortified foods (milk, cereals, orange juice).  RDA:  Adults 19-70 years: 600 International Units (IU)  Adults 71+ years: 800 IU  Supplements: If you're concerned about low vitamin D levels, discuss supplementation with your healthcare provider.  2. Engage in Regular Exercise:  Physical activity, particularly weight-bearing and muscle-strengthening exercises, is vital for building and maintaining bone density.  Weight-Bearing Exercises: These activities make your bones work against gravity. Examples include:  Brisk walking, hiking, jogging  Dancing, stair climbing  Tennis, basketball, volleyball  Aim for at least 30 minutes on most days of the week.  Muscle-Strengthening (Resistance) Exercises: These exercises involve working your muscles against resistance, which also puts stress on bones, promoting strength. Examples include:  Lifting weights (free weights or machines)  Using resistance bands  Bodyweight exercises (push-ups, squats)  Aim for sessions 2-3 times per week, working all major muscle groups.  Balance and Posture Exercises: Activities like Tai Chi and Pilates can improve balance and coordination, reducing the risk of falls, which are a major cause of fractures in people with osteoporosis.  3. Make Healthy Lifestyle Choices:  Avoid Smoking: Smoking has been shown to contribute to weaker bones and decreased bone density.  Limit Alcohol Consumption: Excessive alcohol intake (more than one drink a day for women, and two for men) can harm your bones and interfere with calcium absorption.  Maintain a Healthy Weight: Being underweight (BMI of 19 or less) can increase osteoporosis risk as there's less bone mass to draw from.  Limit Caffeine: While moderate intake (2-3 cups of coffee/tea) is generally fine with adequate calcium, excessive caffeine can potentially affect calcium absorption.  4. Early Prevention is Key:  Osteoporosis prevention should begin in childhood and adolescence. Building peak bone mass during these formative years provides a stronger foundation for later life, reducing the likelihood of developing weak bones as you age.  5. Know Your Risk Factors:  Certain factors can increase your risk of developing osteoporosis. Some are unmodifiable, while others can be managed:  Unmodifiable Risk Factors:  Gender: Women are at higher risk, especially after menopause due to decreased estrogen levels.  Age: Bone density naturally decreases with age.  Race: Individuals of White or Asian descent are at higher risk.  Family History: A family history of osteoporosis or fractures increases your risk.  Body Frame Size: Small, thin-boned individuals tend to have higher risk.  Modifiable Risk Factors & Medical Conditions:  Hormone Levels: Low estrogen (menopause, ovary removal, certain cancer treatments) or low testosterone can accelerate bone loss. Overactive thyroid, parathyroid, or adrenal glands can also contribute.  Dietary Deficiencies: Lifelong low calcium or vitamin D intake.  Eating Disorders: Conditions like anorexia can weaken bones.  Certain Medications: Long-term use of corticosteroids and some other medications can affect bone health. Discuss this with your doctor.  Gastrointestinal Surgery: Procedures that reduce stomach size or remove parts of the intestine can limit nutrient absorption.  Sedentary Lifestyle: Lack of physical activity weakens bones.  6. Consider Bone Density Screening:  If you are at higher risk, particularly women over 65 or younger women with significant risk factors, discuss bone density testing with your doctor. Men should also be aware of their risk and discuss testing if they have risk factors or experience a fracture.  By adopting these preventive measures throughout your life, you can significantly reduce your risk of developing osteoporosis and enjoy a future with strong, healthy bones. Always consult with your healthcare provider for personalized advice and to address any specific concerns. |
| **What kind of exercises are beneficial for bone health?** | Building Stronger Bones: The Best Exercises for Bone Health  Regular physical activity plays a crucial role in building and maintaining strong bones throughout life. The most beneficial types of exercises for bone health fall into two main categories: weight-bearing exercises and muscle-strengthening exercises. Additionally, balance exercises are vital, especially for older adults, to prevent falls that can lead to fractures.  Weight-Bearing Exercises: These exercises involve working against gravity while on your feet, which stimulates bone cells to grow stronger. The impact on your bones helps to increase bone density. There are two types of weight-bearing exercises:  High-Impact Weight-Bearing Exercises: These have a more significant effect on bone density but may not be suitable for everyone, especially those with osteoporosis or joint problems. Examples include:  Jogging or running  Jumping rope  High-impact aerobics  Sports like basketball, volleyball, tennis, and netball  Stair climbing (especially at a brisk pace)  Dancing (energetic types)  Low-Impact Weight-Bearing Exercises: These are safer alternatives for most people and still offer bone health benefits. Examples include:  Fast walking or brisk walking  Low-impact aerobics  Using an elliptical trainer  Stair-step machines  Gardening (activities that involve being on your feet and moving)  Muscle-Strengthening Exercises (Resistance Training): These exercises involve moving your body, a weight, or some other resistance against gravity. When muscles pull on bones during these activities, it signals the bones to become stronger and denser. Examples include:  Lifting weights (using free weights, weight machines, or household items like cans)  Using resistance bands  Bodyweight exercises such as:  Squats  Lunges  Push-ups (can be modified against a wall or on knees)  Planks  Sit-to-stands (rising from a chair)  Exercises specifically targeting the upper back can also help with posture and spine health.  Balance Exercises: While not directly building bone density in the same way as weight-bearing or resistance exercises, balance training is crucial for preventing falls, which are a major cause of fractures, particularly in individuals with weakened bones. Examples include:  Tai Chi  Yoga (certain poses, being mindful of any contraindications for osteoporosis)  Standing on one leg  Walking heel-to-toe  Simple exercises like standing up and sitting down without using hands.  Frequency and Intensity:  For optimal bone health, it's generally recommended to:  Engage in weight-bearing aerobic activity on most days of the week for at least 30 minutes. This can be done in one session or broken into shorter 10-minute intervals.  Perform muscle-strengthening exercises at least two to three days per week, targeting all major muscle groups. Aim for 8-12 repetitions per exercise, ensuring the last few repetitions are challenging. Gradually increase the weight or resistance as you get stronger.  Incorporate balance exercises regularly, even daily, for a few minutes each time.  Important Considerations:  Start slowly and gradually increase intensity and duration, especially if you are new to exercise.  Consult your doctor before starting a new exercise program, particularly if you have osteoporosis, a history of fractures, or other health conditions. They can help you determine which exercises are safe and appropriate for you.  Proper form is crucial to prevent injuries. Consider working with a physical therapist or certified trainer to learn correct techniques.  Variety is beneficial. Combining different types of exercises can work various parts of your body and keep your routine interesting.  Consistency is key. The bone-building benefits of exercise are most significant when performed regularly over the long term.  Listen to your body. Avoid exercises that cause pain. If you experience pain, stop and consult with a healthcare professional.  While activities like swimming and cycling are excellent for cardiovascular health and muscle strength, they are not weight-bearing and thus have less direct impact on bone density. However, they can still be part of a well-rounded fitness program, supplemented with specific bone-boosting exercises. |
| **What dietary changes should I make to prevent or treat osteoporosis?** | Eating for Strong Bones: Dietary Strategies to Prevent and Manage Osteoporosis  A well-balanced diet rich in specific nutrients is crucial for preventing osteoporosis and managing the condition if you already have it. By making strategic food choices, you can help build and maintain bone density, reducing your risk of fractures. The cornerstones of a bone-healthy diet are adequate calcium and vitamin D intake, but other nutrients also play important supporting roles. Conversely, some dietary habits can be detrimental to bone health.  Key Nutrients for Bone Health:  Calcium: This mineral is the primary building block of bone. If your dietary calcium intake is insufficient, your body will draw calcium from your bones, weakening them over time.  Recommended Intake:  Adults (19-50 years) and Men (51-70 years): Generally 1,000 milligrams (mg) per day.  Women (51+ years) and Men (71+ years): Typically 1,200 mg per day.  Individuals with osteoporosis or at high risk might have specific recommendations from their healthcare provider, potentially up to 1,300 mg per day.  Good Food Sources:  Dairy products: Milk, cheese, and yogurt are excellent sources.  Green leafy vegetables: Kale, collard greens, broccoli, and bok choy (note: spinach contains calcium but also oxalates that reduce its absorption).  Fish with edible bones: Canned sardines and salmon.  Fortified foods: Many cereals, plant-based milks (soy, almond, oat), orange juice, and tofu are fortified with calcium.  Nuts and seeds: Almonds, chia seeds, and sesame seeds.  Legumes: Beans and lentils.  Vitamin D: Essential for calcium absorption, vitamin D plays a vital role in bone mineralization. Many people do not get enough vitamin D through diet and sunlight alone.  Recommended Intake:  Adults (19-70 years): Generally 600 International Units (IU) per day.  Adults (71+ years): Typically 800 IU per day.  Some guidelines suggest that adults over 50, or those with osteoporosis or at risk, may need 800-2,000 IU per day. It's best to consult a doctor for personalized advice, as excessive intake can also be harmful.  Good Food Sources:  Fatty fish: Salmon, mackerel, tuna, and sardines.  Egg yolks.  Liver.  Fortified foods: Milk, some yogurts, orange juice, and breakfast cereals often have added vitamin D.  Sunlight: Our bodies can produce vitamin D from sun exposure. However, factors like geographic location, skin tone, sunscreen use, and time of year can limit production.  Protein: Adequate protein intake is essential for bone structure and repair. It also helps maintain muscle mass, which is important for preventing falls.  Recommended Intake: Aim for a balanced intake, generally around 1.0-1.2 grams of protein per kilogram of body weight per day, especially for older adults or those with osteoporosis.  Good Food Sources: Lean meats, poultry, fish, eggs, dairy products, legumes, nuts, seeds, and soy products like tofu.  Magnesium: This mineral contributes to bone structure and helps regulate calcium and vitamin D levels.  Good Food Sources: Green leafy vegetables, nuts (almonds, cashews), seeds (pumpkin, chia), whole grains, beans, avocados, and dark chocolate.  Vitamin K: Important for producing proteins necessary for bone formation and mineralization. Vitamin K2, in particular, is highlighted for its role in bone health.  Good Food Sources:  Vitamin K1 (phylloquinone): Green leafy vegetables like kale, spinach, collard greens, and broccoli.  Vitamin K2 (menaquinones): Found in fermented foods (like natto, a traditional Japanese soybean dish), cheese, and egg yolks.  Phosphorus: Works in conjunction with calcium to build strong bones. While essential, an excessively high intake, especially with low calcium intake, can be detrimental.  Good Food Sources: Dairy products, meat, poultry, fish, nuts, seeds, and whole grains. A balanced diet usually provides enough phosphorus.  Zinc: This trace mineral is involved in bone formation and mineralization.  Good Food Sources: Oysters, red meat, poultry, beans, nuts, seeds, and dairy products.  Dietary Factors That Can Negatively Impact Bone Health:  Excessive Sodium (Salt): High salt intake can lead to increased calcium excretion through urine, potentially weakening bones over time. Aim to limit processed foods, which are often high in sodium, and use salt sparingly. The general recommendation is to consume less than 2,300 mg of sodium per day.  Excessive Alcohol: Heavy alcohol consumption (more than 1 drink per day for women and 2 for men) can interfere with calcium and vitamin D absorption and disrupt hormones involved in bone formation.  Excessive Caffeine: While moderate intake (2-3 cups of coffee per day) is generally not considered harmful for those with adequate calcium intake, very high caffeine consumption may slightly increase calcium excretion.  Soft Drinks (especially Colas): Some research suggests a link between high cola intake and lower bone density. This may be due to the phosphoric acid content, which could alter calcium balance, or because these drinks often displace more nutritious, calcium-rich beverages.  High Intake of Added Sugars: Diets high in added sugars can lead to the excretion of bone-building minerals like calcium and magnesium and may impair vitamin D's effectiveness in calcium absorption.  Oxalates: Found in foods like spinach, rhubarb, and some beans, oxalates can bind to calcium and reduce its absorption. While these foods are nutritious, it's important to consume a variety of calcium sources and not rely solely on high-oxalate foods for your calcium intake. Soaking beans before cooking can reduce their phytate content (another compound that can modestly reduce mineral absorption).  Phytates: Present in whole grains (especially wheat bran), legumes, nuts, and seeds, phytates can also modestly reduce the absorption of calcium and other minerals. However, these foods are highly nutritious, and their benefits generally outweigh this effect. Soaking, sprouting, or fermenting these foods can reduce phytate levels. It's generally advised not to take calcium supplements at the exact same time as consuming very high-phytate foods like 100% wheat bran.  Hydrogenated Oils: The process of hydrogenation can destroy vitamin K naturally present in vegetable oils. Limiting processed snacks and fried foods that often contain these oils is advisable.  General Dietary Recommendations for Osteoporosis:  Prioritize a Balanced Diet: Focus on a diet rich in fruits, vegetables, whole grains, lean protein, and dairy or calcium-fortified alternatives. This approach ensures a good supply of various nutrients essential for overall health, including bone health.  Ensure Adequate Calcium and Vitamin D: Pay close attention to your daily intake of these two key nutrients through food and, if necessary, supplements.  Consider Supplementation Wisely: If you struggle to meet your calcium or vitamin D needs through diet alone, especially if you have osteoporosis or are at high risk, discuss supplementation with your doctor or a registered dietitian. They can recommend appropriate dosages.  Maintain a Healthy Body Weight: Being underweight (BMI under 19) is a risk factor for osteoporosis.  Limit Detrimental Substances: Be mindful of your intake of sodium, alcohol, caffeine, and added sugars.  Consult a Healthcare Professional:  It's important to discuss your individual dietary needs and any potential changes with your doctor or a registered dietitian. They can help you develop a personalized eating plan that considers your overall health, risk factors for osteoporosis, and any medications you may be taking. They can also advise on appropriate supplementation if needed. |
| **Do calcium and vitamin D supplements help in osteoporosis?** | Calcium and Vitamin D Supplements: A Key Role in Osteoporosis Management, But Not a Standalone Solution  Calcium and Vitamin D supplements play a significant role in managing osteoporosis and are widely recommended, particularly for individuals with insufficient dietary intake or diagnosed deficiencies. These nutrients are fundamental to bone health, with vitamin D facilitating the absorption of calcium, which is crucial for maintaining bone density and strength.  For individuals with osteoporosis, healthcare providers often prescribe calcium and vitamin D supplements in conjunction with specific osteoporosis medications. This combination aims to maximize the effectiveness of the treatment and support overall bone health. Adequate levels of both nutrients are considered essential for those undergoing osteoporosis therapy.  The evidence suggests that for certain populations, such as frail and institutionalized older adults, calcium and vitamin D supplementation can be beneficial in reducing the risk of fractures. These individuals are often at higher risk for deficiencies and may benefit most directly from supplementation.  However, the role of calcium and vitamin D supplements in preventing fractures in the broader community-dwelling adult population, especially as a primary prevention strategy for those without diagnosed osteoporosis or significant risk factors, is more nuanced. While essential for bone health, large-scale studies and reviews by organizations like the U.S. Preventive Services Task Force (USPSTF) have found that the evidence for widespread supplementation solely for fracture prevention in the general population is not consistently strong or is insufficient, particularly at lower doses. The USPSTF has specific recommendations that vary based on age, sex, and dosage, and generally advises against low-dose supplementation for primary fracture prevention in postmenopausal women without osteoporosis.  It's important to note that obtaining calcium preferably through dietary sources is often encouraged, with supplements used when intake is inadequate. There can also be risks associated with excessive intake of calcium and vitamin D, such as kidney stones.  In summary:  Essential for Bone Health: Calcium and Vitamin D are vital for building and maintaining healthy bones.  Important in Osteoporosis Management: They are a key component of managing diagnosed osteoporosis, often recommended alongside other medications.  Fracture Prevention: Evidence for fracture prevention through supplementation alone is strongest in specific high-risk groups like frail, institutionalized elderly individuals. For the general population without osteoporosis, the evidence for fracture prevention through supplementation is less clear-cut.  Consult a Healthcare Provider: It is crucial to consult with a doctor to determine individual needs for calcium and vitamin D, the appropriateness of supplementation, and the correct dosage, considering overall health, diet, and risk factors for osteoporosis. Self-prescribing high doses of supplements is not recommended. |
| **What medications are available to treat osteoporosis?** | Osteoporosis: A Range of Medications Available to Strengthen Bones and Reduce Fracture Risk  Osteoporosis, a condition characterized by weakened bones and an increased risk of fractures, can be managed with a variety of medications. These treatments work in different ways to either slow down bone loss or promote new bone formation. The choice of medication depends on various factors including the severity of bone loss, patient's medical history, age, gender, and potential side effects.  Here's an overview of the main classes of medications available for treating osteoporosis:  1. Bisphosphonates:  Often the first line of treatment, bisphosphonates work by inhibiting osteoclasts, the cells responsible for breaking down bone. This action helps to preserve bone density and reduce fracture risk.  * Examples: Alendronate (Fosamax), Risedronate (Actonel), Ibandronate (Boniva), Zoledronic acid (Reclast, Aclasta).  * Administration: Available as oral tablets (daily, weekly, or monthly) or intravenous infusions (quarterly or annually). Specific instructions, such as taking them on an empty stomach and remaining upright, are crucial for oral forms to ensure proper absorption and minimize esophageal irritation.  * Common Side Effects: Nausea, abdominal pain, heartburn-like symptoms. Intravenous forms can cause flu-like symptoms. Rare but serious side effects include osteonecrosis of the jaw (ONJ) and atypical femoral fractures (AFF) with long-term use.  2. Denosumab (RANK Ligand Inhibitor):  Denosumab is a monoclonal antibody that targets a protein called RANK ligand (RANKL), which is essential for the formation, function, and survival of osteoclasts. By blocking RANKL, denosumab decreases bone resorption and increases bone mass.  * Example: Prolia  * Administration: Given as a subcutaneous injection every six months by a healthcare professional.  * Common Side Effects: Back pain, muscle or joint pain, skin reactions at the injection site. Similar to bisphosphonates, rare risks of ONJ and AFF exist. It's important to note that discontinuing denosumab without transitioning to another osteoporosis medication can lead to a rapid loss of bone density and an increased risk of spinal fractures.  3. Hormone-Related Therapies:  These medications affect bone density, particularly in postmenopausal women.  * Estrogen Therapy (Hormone Replacement Therapy - HRT): Can help maintain bone density, especially when started soon after menopause. However, due to potential risks like blood clots, stroke, and breast cancer, it's typically used for women who also require treatment for menopausal symptoms and at the lowest effective dose for the shortest duration.  * Selective Estrogen Receptor Modulators (SERMs): These drugs mimic estrogen's beneficial effects on bone density in postmenopausal women without some of the risks associated with estrogen.  * Example: Raloxifene (Evista)  * Administration: Oral tablet taken daily.  * Common Side Effects: Hot flashes, leg cramps. May increase the risk of blood clots.  * Tissue-Specific Estrogen Complex (TSEC): Combines estrogen with a drug that blocks estrogen's effects on the uterus.  * Example: Conjugated estrogens/bazedoxifene (Duavee)  * Administration: Oral tablet taken daily.  * Common Side Effects: Similar risks to other hormonal products.  4. Anabolic Agents (Bone-Building Medications):  These medications stimulate new bone formation. They are typically reserved for individuals with severe osteoporosis, a very high fracture risk, or when other treatments haven't been effective.  * Parathyroid Hormone (PTH) Analogs and Parathyroid Hormone-Related Protein (PTHrP) Analogs: These drugs are synthetic forms of hormones that regulate calcium and phosphate metabolism, stimulating osteoblasts (bone-building cells).  * Examples: Teriparatide (Forteo, Bonsity), Abaloparatide (Tymlos)  * Administration: Daily subcutaneous injections, typically for a limited treatment duration (e.g., up to 2 years).  * Common Side Effects: Dizziness, headaches, nausea, leg cramps.  * Sclerostin Inhibitor: This newer class of medication works by blocking sclerostin, a protein that inhibits bone formation. This dual effect leads to increased bone formation and decreased bone resorption.  * Example: Romosozumab (Evenity)  * Administration: Monthly subcutaneous injections by a healthcare professional, usually for one year. It is often followed by an anti-resorptive medication to maintain the bone gained.  * Common Side Effects: Joint pain, headache. May carry an increased risk of cardiovascular events, so it's not recommended for individuals with a recent history of heart attack or stroke.  5. Calcitonin:  Calcitonin is a hormone naturally produced in the thyroid gland that can slow bone breakdown. Its effect on bone density is less potent than other osteoporosis medications.  * Example: Miacalcin, Fortical  * Administration: Available as a nasal spray or injection.  * Common Side Effects: Nasal irritation (for the spray), nausea. It is generally considered a second or third-line treatment due to its modest efficacy.  Important Considerations:  Calcium and Vitamin D: Adequate intake of calcium and vitamin D is crucial for bone health and is often recommended in conjunction with osteoporosis medications.  Individualized Treatment: The choice of medication is a decision made between a patient and their healthcare provider, taking into account individual risk factors, benefits, and potential side effects of each option.  Duration of Treatment: The length of treatment varies depending on the medication and individual response. Some medications, like bisphosphonates, may have a "drug holiday" (a temporary pause in treatment) considered after several years. Others, like anabolic agents, have defined treatment lengths.  Lifestyle Modifications: Medications are typically part of a broader osteoporosis management plan that includes regular weight-bearing exercise and fall prevention strategies.  Ongoing research continues to explore new therapeutic targets and develop more effective and safer treatments for osteoporosis. Patients are encouraged to discuss all available options with their doctor to determine the most appropriate treatment plan for their specific needs. |
| **How long do I need to take medication for osteoporosis?** | Navigating Osteoporosis Treatment: A Long-Term Commitment with Personalised Adjustments  Treating osteoporosis is generally a long-term commitment, often spanning several years. However, the precise duration of medication is not a one-size-fits-all answer and depends on a variety of individual factors, the specific medication prescribed, and ongoing assessments by a healthcare professional.  Key Factors Influencing Treatment Duration:  Individual Fracture Risk: Your doctor will assess your risk of breaking a bone based on factors like your bone mineral density (BMD), age, history of previous fractures, family history, and lifestyle. Higher risk may necessitate longer treatment.  Specific Medication: Different types of osteoporosis medications have different typical treatment lengths and considerations:  Bisphosphonates (e.g., alendronate, risedronate, zoledronic acid): These are commonly prescribed for many years. After an initial treatment period, often 3 to 5 years, your doctor may reassess your fracture risk. If the risk has lowered and bone density is stable, a "drug holiday" (a temporary pause in treatment) might be considered. However, this is not suitable for everyone and requires careful monitoring. Treatment may be restarted if risk increases or bone density declines.  Denosumab (Prolia): This medication is administered by injection every six months. It is generally considered a long-term treatment. Unlike bisphosphonates, stopping denosumab can lead to a rapid loss of bone density and an increased risk of fractures, particularly spinal fractures. Therefore, if denosumab is discontinued, another osteoporosis medication is typically started to protect the bone. "Drug holidays" are generally not recommended with denosumab.  Teriparatide (Forsteo) and Abaloparatide (Tymlos): These are bone-building medications usually prescribed for up to 18 to 24 months. After completing a course, another type of osteoporosis medication (like a bisphosphonate or denosumab) is typically started to maintain the bone density gained.  Romosozumab (Evenity): This is another bone-building medication, typically given for 12 months. Similar to teriparatide and abaloparatide, treatment with romosozumab is usually followed by an anti-resorptive medication to preserve bone mass.  Selective Estrogen Receptor Modulators (SERMs) (e.g., raloxifene): These may be used long-term in postmenopausal women.  Hormone Replacement Therapy (HRT): The duration of HRT is a complex decision made in consultation with a doctor, balancing benefits for bone health with other potential risks and benefits.  Response to Treatment: How well your bone density responds to medication and whether you experience any new fractures will influence treatment duration.  Side Effects: The presence and severity of any side effects can also impact the decision to continue or change medication.  Regular Reviews: It is crucial to have regular check-ups with your doctor. These appointments will involve reassessing your fracture risk, monitoring your bone density (often through DXA scans), and reviewing your medication regimen. These reviews typically occur every few years, depending on the medication and individual circumstances.  General Principles:  Osteoporosis medication is generally taken for many years to effectively reduce fracture risk.  There is no universal "stop date" for treatment, and decisions are highly individualized. As bone loss can continue with age, treatment may still be beneficial for older individuals.  Always consult your doctor before making any changes to your osteoporosis medication. Do not stop treatment on your own, as this could increase your risk of fractures.  In summary, while osteoporosis treatment is often a long-term endeavor, the specific duration is a dynamic decision made in partnership with your healthcare provider, considering your unique situation, the medication you are taking, and your response to therapy. |
| **Are there any side effects of osteoporosis treatments?** | Yes, like all medications, osteoporosis treatments can have side effects. These vary depending on the specific type of medication, the individual patient, and factors such as dosage and duration of treatment. It's important to discuss potential side effects with your doctor.  Here's a breakdown of common osteoporosis treatments and their potential side effects:  1. Bisphosphonates  Examples: Alendronate (Fosamax), Risedronate (Actonel), Ibandronate (Boniva), Zoledronic acid (Reclast - given intravenously)  Common Side Effects (Oral):  Nausea  Heartburn  Stomach pain  Irritation of the esophagus (the tube connecting the throat to the stomach)  Difficulty swallowing  Gastric ulcers  Bone, joint, or muscle pain  Common Side Effects (Intravenous - IV):  Flu-like symptoms (fever, headache, muscle aches) for a few days after infusion.  Bone, joint, or muscle pain.  Less Common but Serious Side Effects:  Osteonecrosis of the Jaw (ONJ): A rare condition where the jawbone doesn't heal properly, often after a dental procedure like a tooth extraction. The risk increases with longer treatment duration (especially over 4-5 years) and in patients with other risk factors like cancer or steroid use.  Atypical Femoral Fractures: Unusual fractures in the thigh bone, which can occur with long-term use (typically more than 3-5 years).  Severe bone, joint, or muscle pain.  Kidney problems (especially with IV forms if not properly hydrated or if pre-existing kidney disease is present).  Low blood calcium levels (hypocalcemia), particularly if vitamin D and calcium intake are insufficient.  Eye inflammation (uveitis) - rare.  2. Denosumab (Prolia)  This is a biologic medication given as an injection every six months.  Common Side Effects:  Pain in muscles or bones (especially back, arms, and legs)  Skin problems (e.g., rash, eczema, blisters, itching, redness, dry skin)  Increased risk of infections, especially skin infections (e.g., cellulitis)  Headache  Less Common but Serious Side Effects:  Hypocalcemia (low blood calcium): Can be severe, especially in patients with kidney problems. Calcium and vitamin D levels must be adequate before starting.  Osteonecrosis of the Jaw (ONJ): Similar risk to bisphosphonates.  Atypical Femoral Fractures: Similar risk to bisphosphonates.  Serious infections requiring hospitalization.  Severe allergic reactions.  Multiple vertebral fractures after stopping treatment (rare, but a known risk).  3. Parathyroid Hormone (PTH) and Parathyroid Hormone-Related Protein (PTHrP) Analogs  Examples: Teriparatide (Forteo), Abaloparatide (Tymlos) - given as daily injections. These medications build new bone.  Common Side Effects:  Dizziness  Headaches  Nausea  Increased heart rate (palpitations or tachycardia)  Injection site reactions (redness, pain)  Temporary increases in blood or urine calcium levels  Leg cramps  Less Common but Serious Side Effects:  Osteosarcoma (a type of bone cancer): This was seen in animal studies at high doses. The risk in humans is considered low, but treatment is typically limited to 18-24 months.  High calcium levels in the blood (hypercalcemia) or urine (hypercalciuria), which could lead to kidney stones.  4. Romosozumab (Evenity)  This is a newer biologic medication given as monthly injections for up to one year. It both increases bone formation and decreases bone breakdown.  Common Side Effects:  Joint pain  Headache  Muscle spasms  Peripheral edema (swelling in legs, ankles, or arms)  Injection site reactions  Insomnia  Serious Side Effects:  BOXED WARNING: Increased risk of heart attack, stroke, and cardiovascular death. It should not be used in patients who have had a heart attack or stroke within the previous year.  Hypocalcemia (low blood calcium)  Osteonecrosis of the Jaw (ONJ)  Atypical Femoral Fractures  Serious allergic reactions  5. Selective Estrogen Receptor Modulators (SERMs)  Example: Raloxifene (Evista) - taken as an oral tablet.  Common Side Effects:  Hot flashes  Leg cramps  Swelling in the hands, feet, or ankles  Flu-like symptoms  Joint pain  Less Common but Serious Side Effects:  Increased risk of blood clots: This includes deep vein thrombosis (DVT) in the legs and pulmonary embolism (PE) in the lungs.  Increased risk of fatal stroke: Particularly in women with coronary artery disease or at high risk for it.  6. Hormone Replacement Therapy (HRT)  Estrogen, with or without progestin, can be used to prevent and treat osteoporosis, especially in women experiencing menopausal symptoms.  Common Side Effects:  Headaches  Breast tenderness  Nausea  Weight gain  Vaginal bleeding (especially in the first few months or with certain regimens)  Serious Risks (especially with long-term use or when started in older women):  Increased risk of blood clots (DVT, PE)  Increased risk of stroke  Increased risk of breast cancer (especially with combined estrogen-progestin therapy)  Increased risk of heart disease (in some populations, particularly older women starting HRT)  Increased risk of endometrial cancer (if estrogen is taken alone by a woman with a uterus; progestin reduces this risk)  Gallbladder disease  Important Considerations:  Communicate with your doctor: Always report any side effects you experience to your healthcare provider. They can help determine if the side effects are related to the medication and suggest ways to manage them.  Individual response: Not everyone will experience side effects, and the severity can vary.  Risk vs. Benefit: Your doctor will weigh the potential benefits of an osteoporosis treatment against the possible risks of side effects based on your individual health status and fracture risk.  Pre-existing conditions: Certain medical conditions may increase your risk of side effects from specific osteoporosis medications.  Dental health: Good oral hygiene and regular dental check-ups are important, especially if you are taking medications associated with ONJ (bisphosphonates, denosumab, romosozumab). Inform your dentist if you are on these medications.  Calcium and Vitamin D: Adequate intake of calcium and vitamin D is crucial for the effectiveness of osteoporosis treatments and can help prevent some side effects like hypocalcemia.  This information is not exhaustive, and it's crucial to have a detailed discussion with your doctor about the specific treatment recommended for you and its potential side effects. |
| **Can osteoporosis be reversed with treatment?** | Osteoporosis: Reversal and Treatment Outcomes  While osteoporosis cannot be completely reversed to restore bones to their original strength, current treatments can effectively stop further bone loss, improve bone mineral density (BMD), and in some cases, even rebuild bone to a certain extent. The primary goal of osteoporosis management is to reduce the risk of fractures.  Understanding Bone Remodeling and Osteoporosis  Bone is a living tissue that is constantly undergoing a process of breakdown and renewal, known as remodeling. Osteoporosis occurs when the rate of bone breakdown outpaces the rate of bone formation, leading to weaker, more porous bones that are susceptible to fractures.  Treatment Approaches and Their Impact  Treatment for osteoporosis typically involves a combination of medication and lifestyle modifications.  Medications:  Antiresorptive medications: Drugs like bisphosphonates (e.g., alendronate, risedronate, zoledronic acid) and denosumab slow down bone breakdown. This allows bone formation to catch up, leading to an increase in BMD and a reduction in fracture risk. Studies have shown that bisphosphonates can increase spinal bone density by 6-8% and hip bone density by 4-6% over three years, significantly reducing fracture rates.  Anabolic medications: These drugs, such as teriparatide and romosozumab, stimulate new bone formation. Teriparatide, a parathyroid hormone analog, has been shown to dramatically increase bone mineral density, particularly in the spine (by as much as 13% in 18 months), and reduce fracture risk. Romosozumab works by both increasing bone formation and decreasing bone resorption. After a course of anabolic treatment, an antiresorptive medication is typically started to maintain the newly formed bone.  Selective Estrogen Receptor Modulators (SERMs): Medications like raloxifene can mimic the bone-preserving effects of estrogen and are used in postmenopausal women. They can help maintain bone density and reduce the risk of certain fractures, particularly in the spine.  Hormone Replacement Therapy (HRT): Estrogen therapy can prevent bone loss and reduce fracture risk in postmenopausal women, but it's generally considered when other treatments are not suitable or when managing menopausal symptoms, due to potential risks.  Lifestyle Modifications:  Adequate Calcium and Vitamin D Intake: These are crucial for bone health. Calcium is the primary building block of bone, and vitamin D aids in calcium absorption. Dietary sources are preferred, but supplements may be necessary.  Regular Weight-Bearing and Muscle-Strengthening Exercises: Activities like walking, jogging, dancing, and resistance training put stress on bones, stimulating them to become stronger and denser. Exercise also improves balance and coordination, reducing the risk of falls.  Healthy Lifestyle Choices: Avoiding smoking and excessive alcohol consumption is important, as these habits can accelerate bone loss.  Can Bone Loss Be "Reversed"?  While treatments cannot restore bone architecture to a youthful, pre-osteoporotic state, they can lead to significant improvements in BMD. For example, anabolic agents can actively build new bone, leading to a measurable increase in density that can move individuals out of the osteoporotic range. Antiresorptive drugs halt further loss and allow the body's natural bone-building processes to improve density over time.  Therefore, while the term "complete reversal" might be misleading, treatments can "reverse" some of the bone loss, increase bone strength, and most importantly, substantially lower the risk of fractures, which is the primary clinical consequence of osteoporosis. The success of treatment is typically monitored through follow-up bone density scans.  In conclusion, individuals with osteoporosis can experience meaningful improvements in their bone health and a reduced risk of fractures with appropriate and consistent treatment, even if a complete return to pre-disease bone status is not currently achievable. |
| **Topic: Prognosis** | |
| **Can I live a normal life with osteoporosis?** | Living a "Normal Life" with Osteoporosis: It's Possible with Management and Adaption  Yes, it is possible to live a fulfilling and relatively "normal" life with osteoporosis. While the condition, characterized by weakened and brittle bones, presents undeniable challenges and requires lifelong management, individuals can maintain a good quality of life by taking proactive steps.  Osteoporosis, often called a "silent disease," may not show symptoms in its early stages. However, as it progresses, it can lead to back pain, a gradual loss of height, a stooped posture, and an increased susceptibility to fractures, even from minor stresses like bending over or coughing. These fractures most commonly occur in the hip, wrist, or spine and can significantly impact daily activities, mobility, and independence.  However, a diagnosis of osteoporosis is not a sentence to a severely restricted life. Effective management strategies can help control the disease's progression, reduce fracture risk, and enable individuals to continue engaging in many of their usual activities.  Key aspects of living well with osteoporosis include:  Medical Treatment: Various medications are available to help slow bone loss, increase bone density, and reduce fracture risk. These include bisphosphonates, denosumab, hormone-related therapies, and newer bone-building medications. Consulting with a doctor to determine the most appropriate treatment plan is crucial.  Lifestyle Adjustments:  Diet: A balanced diet rich in calcium and vitamin D is essential for bone health. Good sources include dairy products, leafy green vegetables, fortified foods, and fatty fish. Supplements may be recommended if dietary intake is insufficient.  Exercise: Regular weight-bearing and muscle-strengthening exercises, such as walking, dancing, low-impact aerobics, and lifting weights, can help improve bone strength and balance, reducing the risk of falls. It's important to consult a healthcare professional or physical therapist to ensure exercises are safe and appropriate.  Fall Prevention: This is a critical component of managing osteoporosis. Strategies include removing trip hazards in the home, ensuring adequate lighting, installing grab bars in bathrooms, wearing supportive footwear, and using assistive devices like canes or walkers if needed.  Avoiding Harmful Habits: Smoking and excessive alcohol consumption can negatively impact bone health and should be avoided.  Pain Management: If fractures or other complications cause pain, various pain management techniques, including medication, heat/cold therapy, and physical therapy, can help.  Education and Support: Understanding the condition and connecting with others through support groups can provide valuable emotional and practical assistance. Organizations like the International Osteoporosis Foundation and national societies offer resources and support networks.  Prognosis and Outlook:  While there is no cure for osteoporosis, treatments can significantly slow its progression and reduce the likelihood of fractures. The long-term outlook depends on several factors, including the age at diagnosis, the severity of bone loss, adherence to treatment and lifestyle recommendations, and overall health. Early detection and consistent management are key to maintaining bone health and quality of life.  Living with osteoporosis may require adapting certain activities and being more mindful of bone health, but it does not necessarily mean giving up an active and engaged life. By working closely with healthcare providers, making necessary lifestyle modifications, and prioritizing safety, individuals with osteoporosis can continue to lead meaningful and largely "normal" lives. |

**Supplementary Table 3.** Model-generated responses from DeepSeek-R1.

Full text of the 25 question–response pairs generated by DeepSeek-R1. Responses were obtained using real-time web access and were subsequently assessed by five orthopedic experts.

| **Question** | **DeepSeek-R1 Response** |
| --- | --- |
| **Topic: Pathogenesis** | |
| **What is osteoporosis?** | Osteoporosis is a chronic bone disease characterized by decreased bone density and deterioration of bone tissue, leading to fragile bones and an increased risk of fractures. Often termed a "silent disease," it typically progresses without symptoms until a fracture occurs, commonly in the hip, spine, or wrist.  Key Features:  Pathophysiology:  Bones undergo continuous remodeling (breakdown and rebuilding). Osteoporosis arises when bone resorption outpaces formation, resulting in porous, weak bones.  Reduced bone mineral density (BMD) compromises structural integrity.  Risk Factors:  Age: Risk increases with aging.  Gender: Postmenopausal women (due to estrogen decline) are at higher risk, though men can also develop it.  Lifestyle: Low calcium/vitamin D intake, sedentary habits, smoking, excessive alcohol.  Medical Factors: Hormonal imbalances (e.g., low testosterone), long-term corticosteroid use, conditions like hyperthyroidism or rheumatoid arthritis.  Genetics: Family history or small body frame.  Symptoms:  Often asymptomatic until fracture.  Spinal fractures may cause height loss, kyphosis (stooped posture), or chronic back pain.  Diagnosis:  DEXA Scan: Measures BMD via a T-score:  Normal: ≥ -1.0  Osteopenia (mild bone loss): -1.0 to -2.5  Osteoporosis: ≤ -2.5  Management:  Prevention: Adequate calcium (1,000–1,200 mg/day) and vitamin D (600–800 IU/day), weight-bearing exercise, fall prevention.  Medications: Bisphosphonates (e.g., alendronate), hormone therapy (e.g., estrogen), anabolic agents (e.g., teriparatide).  Monitoring: Regular BMD testing for high-risk individuals.  Complications:  Fractures can lead to disability, chronic pain, reduced mobility, and secondary issues (e.g., pneumonia from immobility post-hip fracture).  Public Health Impact:  A significant concern in aging populations, osteoporosis underscores the need for early screening and lifestyle interventions to mitigate fracture risk and improve quality of life. |
| **What causes bone loss in osteoporosis?** | Bone loss in osteoporosis results from a complex interplay of factors leading to an imbalance between bone resorption (breakdown) and formation. Here's a structured breakdown of the causes:  Hormonal Changes:  Estrogen Decline (Postmenopausal Women): Reduced estrogen levels increase osteoclast activity, accelerating bone resorption.  Testosterone Decline (Men): Lower testosterone can reduce osteoblast activity, impairing bone formation.  Parathyroid Hormone (PTH): Chronic elevation (due to low calcium intake or vitamin D deficiency) stimulates bone resorption to release calcium.  Aging:  Reduced Bone Formation: Osteoblast activity diminishes with age, slowing bone rebuilding.  Calcium Absorption Issues: Aging kidneys convert less vitamin D to its active form, reducing calcium absorption and increasing PTH.  Nutritional Deficiencies:  Calcium: Inadequate intake forces the body to leach calcium from bones.  Vitamin D: Deficiency impairs calcium absorption, exacerbating bone loss.  Other Nutrients: Low protein, vitamin K, or magnesium may weaken bone structure.  Lifestyle Factors:  Sedentary Behavior: Weight-bearing exercise stimulates bone formation; inactivity leads to bone loss.  Smoking/Alcohol: Toxins impair osteoblast function and reduce calcium absorption.  Medical Conditions and Medications:  Corticosteroids: Suppress osteoblasts and increase osteoclast activity.  Chronic Diseases: Hyperthyroidism, rheumatoid arthritis, or gastrointestinal disorders disrupt bone metabolism.  Genetic Predisposition:  Family History: Genes influence peak bone mass and remodeling efficiency.  Body Weight:  Low BMI: Less mechanical stress on bones reduces bone density maintenance.  Mechanism: Osteoclasts outpace osteoblasts, leading to net bone loss. Over time, this reduces bone density and microarchitecture, increasing fracture risk.  Conclusion: Osteoporosis is multifactorial, involving hormonal shifts, aging, nutrition, lifestyle, genetics, and health conditions. Addressing these factors through diet, exercise, and medical management can mitigate bone loss. |
| **How does osteoporosis affect the structure of bones?** | Osteoporosis significantly alters bone structure through the following mechanisms:  Trabecular Bone Deterioration:  Loss of Trabeculae: The spongy, honeycomb-like trabecular bone experiences thinning, perforation, and disconnection of its struts, reducing structural support.  Increased Porosity: Larger spaces between trabeculae diminish the bone's ability to absorb impact, increasing fracture risk.  Cortical Bone Thinning:  Reduced Thickness: The dense outer cortical layer becomes thinner and more porous, weakening the bone's protective shell.  Increased Cortical Porosity: Microscopic holes develop, further compromising strength.  Imbalance in Bone Remodeling:  Enhanced Resorption: Osteoclast activity (bone breakdown) outpaces osteoblast activity (bone formation), leading to net bone loss.  Hormonal Influence: Postmenopausal estrogen decline accelerates resorption, exacerbating structural deterioration.  Microarchitectural Disruption:  Disorganized Trabecular Alignment: Loss of alignment along stress lines reduces mechanical efficiency, making bones less resilient to loads.  Biochemical Factors:  Mineral Deficiency: Inadequate calcium and vitamin D impair bone mineralization, weakening the bone matrix and reducing density.  Mechanical Consequences:  Reduced Bone Mineral Density (BMD): Lower BMD measured via DEXA scans correlates with increased fragility.  Fracture Susceptibility: Structural compromises predispose bones to fractures, particularly in the spine, hips, and wrists.  Clinical Implications: These structural changes lead to vertebral compression fractures, height loss, kyphosis (stooped posture), and vulnerability to low-trauma fractures. Addressing osteoporosis involves lifestyle modifications, nutritional supplementation, and medications to restore bone remodeling balance. |
| **Topic: Risk factor** | |
| **What increases my risk of developing osteoporosis?** | Risk Factors for Osteoporosis  Osteoporosis risk factors can be categorized into non-modifiable, modifiable, medical conditions, medications, and lifestyle choices. Here's an organized breakdown:  Non-Modifiable Factors  Age: Risk increases with age, particularly over 50, due to natural bone density loss.  Gender: Women, especially postmenopausal, face higher risk due to estrogen decline.  Genetics: Family history of osteoporosis or fractures increases susceptibility.  Ethnicity: Higher prevalence in Caucasian and Asian populations.  Body Size: Smaller frame or low body weight (BMI <18.5) reduces bone mass reserves.  Modifiable Lifestyle Factors  Dietary Deficiencies:  Low calcium and vitamin D intake.  High sodium or excessive caffeine (>3–4 cups/day), which may impair calcium absorption.  Physical Inactivity: Lack of weight-bearing exercise (e.g., walking, resistance training).  Substance Use:  Smoking (reduces estrogen levels and blood flow to bones).  Excessive alcohol (>2 drinks/day for men, >1 for women).  Sun Exposure: Inadequate sunlight, leading to vitamin D deficiency.  Medical Conditions  Hormonal Imbalances:  Early menopause, hysterectomy with ovary removal, or amenorrhea (e.g., from eating disorders).  Low testosterone in men.  Hyperthyroidism, hyperparathyroidism, or Cushing’s syndrome.  Chronic Diseases:  Rheumatoid arthritis, kidney/liver disease, gastrointestinal disorders (e.g., Crohn’s), or malabsorption syndromes.  Previous Fractures: Especially low-trauma fractures, indicating bone fragility.  Inflammation: Chronic inflammatory conditions affecting bone remodeling.  Medications  Corticosteroids: Long-term use (e.g., prednisone) accelerates bone loss.  Other Drugs: Anticonvulsants, proton pump inhibitors, chemotherapy, or hormone-blocking therapies (e.g., for breast/prostate cancer).  Additional Factors  Eating Disorders: Anorexia or bulimia causing malnutrition.  Immobility: Prolonged bed rest or sedentary lifestyle.  Frequent Falls: Poor balance, vision issues, or muscle weakness.  Key Takeaways  Postmenopausal women and older adults are at highest risk.  Preventive measures include adequate calcium/vitamin D intake, regular exercise, avoiding smoking/alcohol, and monitoring bone density if high-risk.  Medical management of underlying conditions and medication review can mitigate risk.  Addressing modifiable factors early is crucial for reducing osteoporosis risk. Consult a healthcare provider for personalized advice and screening (e.g., DEXA scan). |
| **Is osteoporosis hereditary? My family members have it—am I at higher risk?** | Yes, osteoporosis does have a hereditary component, meaning your family history can increase your risk. Here's a breakdown of the key points:  Genetic Factors  Bone Density & Structure: Up to 80% of bone mineral density (BMD) variation is influenced by genetics. Specific genes like VDR (vitamin D receptor) and COL1A1 (collagen production) are linked to bone health.  Peak Bone Mass: Genetically determined peak bone mass, achieved by early adulthood, affects future fracture risk. Lower peak mass increases susceptibility.  Family Risk  Having a parent or sibling with osteoporosis, especially a hip fracture, raises your risk by 2–3 times.  Shared environmental factors (e.g., diet, physical activity levels) within families may also contribute.  Other Hereditary Conditions  Disorders like cystic fibrosis, celiac disease, or hormonal imbalances (e.g., hyperthyroidism) that run in families can indirectly increase osteoporosis risk by affecting nutrient absorption or bone metabolism.  Modifiable Risk Factors  While genetics play a role, lifestyle choices significantly impact risk:  Diet: Adequate calcium and vitamin D intake.  Exercise: Weight-bearing and resistance training to strengthen bones.  Avoid: Smoking, excessive alcohol, and prolonged inactivity.  Demographics  Gender/Age: Postmenopausal women (due to estrogen decline) and older adults are at higher risk.  Ethnicity: Caucasian and Asian populations have higher baseline risk.  Recommendations  Consult a Doctor: Discuss family history and consider a DEXA scan (bone density test) if over 50 or with other risk factors.  Prevention: Optimize lifestyle habits early to maximize bone health.  In summary, while family history elevates your risk, proactive measures can mitigate it. Genetics may load the gun, but lifestyle often pulls the trigger. |
| **Does menopause increase the risk of osteoporosis?** | Yes, menopause does increase the risk of osteoporosis, primarily due to the decline in estrogen levels, which plays a critical role in maintaining bone density. Here's a structured explanation:  Estrogen's Role: Estrogen inhibits bone resorption (breakdown) by regulating osteoclasts (cells that break down bone). Post-menopause, the sharp decline in estrogen disrupts this balance, leading to accelerated bone loss.  Timeline of Bone Loss:  Women experience rapid bone loss in the first 5–10 years after menopause, increasing fracture risk.  By age 60, about 25% of postmenopausal women in the U.S. have osteoporosis.  Postmenopausal Osteoporosis:  This condition is directly linked to estrogen deficiency. Up to 20% of bone density can be lost during this period.  Vertebral and hip fractures are particularly common, with hip fractures posing significant mortality risks.  Additional Risk Factors:  Age: Natural bone density decline with age compounds postmenopausal bone loss.  Lifestyle: Low calcium/vitamin D intake, sedentary habits, smoking, and alcohol use exacerbate risk.  Genetics/Surgery: Family history or surgical menopause (e.g., oophorectomy) can intensify bone loss.  Prevention and Management:  Hormone Replacement Therapy (HRT): Can mitigate bone loss but carries risks (e.g., cardiovascular events).  Lifestyle: Weight-bearing exercise, adequate calcium (1,200 mg/day) and vitamin D (800–1,000 IU/day).  Medications: Bisphosphonates, SERMs (e.g., raloxifene), and denosumab may be prescribed.  In summary, menopause significantly elevates osteoporosis risk due to estrogen loss, particularly in the early postmenopausal years. Addressing modifiable factors and considering medical interventions can help reduce this risk. |
| **Is osteoporosis more common in women than men? Why?** | Osteoporosis is indeed more common in women than men, primarily due to a combination of biological, hormonal, and lifestyle factors. Here's a structured explanation:  Key Reasons for Higher Prevalence in Women:  Hormonal Changes:  Estrogen Decline: Women experience a rapid drop in estrogen during menopause, which accelerates bone loss. Estrogen plays a critical role in maintaining bone density by inhibiting bone resorption. Post-menopause, this protective effect diminishes, leading to a significant increase in bone loss (approximately 1-2% annually for 5-10 years).  Testosterone in Men: Men have a slower, more gradual decline in testosterone with age, which helps preserve bone density longer. However, severe testosterone deficiency can also increase osteoporosis risk in men.  Peak Bone Mass:  Women typically achieve a lower peak bone mass in early adulthood compared to men. This difference, combined with age-related bone loss, means women reach the threshold for osteoporosis (weakened bones prone to fracture) earlier.  Longevity:  Women generally live longer than men, exposing them to more years of age-related bone loss. Osteoporosis risk increases with age, particularly after 50.  Body Size and Structure:  Men often have larger, denser bones, which are inherently more resistant to fractures. Smaller skeletal frames in women contribute to earlier vulnerability.  Additional Factors:  Genetic and Nutritional Influences: While genetics and diet (e.g., calcium/vitamin D intake) affect bone health, they are secondary to hormonal and structural differences.  Underdiagnosis in Men: Osteoporosis in men is often underrecognized but remains less prevalent due to the factors above.  Conclusion:  The interplay of hormonal shifts (especially post-menopause), lower baseline bone mass, and longer lifespan makes women disproportionately affected by osteoporosis. Men are not immune, but their risk is lower and typically occurs later in life. Preventive measures like weight-bearing exercise, adequate nutrition, and bone density screenings are crucial for both genders, particularly for postmenopausal women. |
| **Does low calcium intake contribute to osteoporosis?** | Yes, low calcium intake is a significant contributing factor to the development of osteoporosis. Here's a structured explanation:  Role of Calcium in Bone Health: Calcium is a critical mineral for maintaining bone density and strength. Bones serve as a reservoir for calcium, which is essential for various bodily functions. When dietary calcium is insufficient, the body withdraws calcium from bones to maintain normal blood levels, leading to reduced bone mass over time.  Mechanism of Bone Loss: Chronic low calcium intake elevates parathyroid hormone (PTH), which stimulates bone resorption (breakdown) to release calcium into the bloodstream. Prolonged resorption weakens bone structure, increasing fracture risk.  Evidence from Studies: Epidemiological studies and clinical trials indicate that populations with adequate calcium intake, especially during growth periods (adolescence) and later life, tend to have higher bone density and lower osteoporosis rates. However, the impact may vary with age, genetics, and other dietary factors.  Interplay with Other Factors:  Vitamin D: Essential for calcium absorption; deficiency can exacerbate calcium-related bone loss.  Hormonal Changes: Postmenopausal estrogen decline accelerates bone loss, making calcium intake crucial for mitigating risk.  Lifestyle Factors: Weight-bearing exercise promotes bone strength, while smoking, excessive alcohol, and high sodium intake can worsen calcium balance.  Recommendations: Adequate daily calcium intake (e.g., 1,000–1,200 mg for adults, depending on age/sex) is advised, alongside vitamin D (600–800 IU/day). Dietary sources (dairy, leafy greens) or supplements can help meet these needs.  Conclusion: While low calcium intake alone is not the sole cause of osteoporosis, it is a key modifiable risk factor. Prevention requires a holistic approach, including sufficient calcium and vitamin D, regular exercise, and addressing hormonal and lifestyle influences. |
| **How does long-term use of steroids affect bone health?** | Long-Term Use of Steroids and Bone Health: A Comprehensive Overview  Introduction:  Long-term use of corticosteroids (e.g., prednisone) significantly impacts bone health, leading to conditions like osteoporosis and fractures. The effects are dose- and duration-dependent, with higher doses and prolonged use exacerbating risk.  Mechanisms of Bone Damage:  Bone Remodeling Imbalance:  Osteoblast Suppression: Corticosteroids inhibit osteoblast function and induce apoptosis (cell death) in osteoblasts and osteocytes, reducing bone formation.  Osteoclast Activation: They prolong osteoclast survival, increasing bone resorption. This imbalance accelerates bone loss.  Calcium Metabolism Disruption:  Reduced Intestinal Absorption: Steroids downregulate intestinal calcium channels, impairing calcium uptake.  Increased Urinary Excretion: They decrease renal calcium reabsorption, leading to hypercalciuria (excess calcium in urine), prompting the body to leach calcium from bones.  Hormonal Effects:  Hypogonadism: Steroids suppress the hypothalamic-pituitary-gonadal axis, lowering estrogen and testosterone levels, which are critical for maintaining bone density.  Muscle Weakness:  Steroid-induced myopathy reduces mechanical stress on bones, diminishing the stimulus for bone maintenance and growth.  Vitamin D Dysregulation:  Impaired conversion to active vitamin D (calcitriol) further reduces calcium absorption, compounding deficiencies.  Clinical Outcomes:  Osteoporosis: Rapid bone loss, particularly in the first 6–12 months of therapy, increases fracture risk, especially in the spine, hips, and ribs.  Avascular Necrosis: Reduced blood supply to bones (e.g., femoral head) can cause bone death.  Fractures: Occur at higher rates, even with minimal trauma, due to compromised bone strength.  Risk Factors:  Dose/Duration: Higher cumulative doses and prolonged use correlate with greater bone loss.  Age/Gender: Postmenopausal women and older adults are at higher risk, but steroids can harm bone health at any age.  Lifestyle Factors: Smoking, alcohol, and sedentary habits exacerbate risks.  Prevention and Management:  Calcium/Vitamin D Supplementation: Mitigates deficiencies; often combined with dietary adjustments.  Bisphosphonates: First-line medications to inhibit resorption (e.g., alendronate).  Exercise: Weight-bearing and resistance training to stimulate bone formation.  Monitoring: Regular DEXA scans to assess bone mineral density.  Alternative Therapies: Consideration of lowest effective steroid dose or steroid-sparing agents.  Conclusion:  Long-term corticosteroid use disrupts bone homeostasis through multiple pathways, necessitating proactive management to prevent irreversible damage. Early intervention with lifestyle changes, supplements, and pharmacotherapy is critical to preserving bone health. |
| **What are signs and symptoms of osteoporosis?** | Osteoporosis is often called a "silent disease" because it typically progresses without symptoms until a fracture occurs. However, some signs and symptoms may indicate its presence:  Early Signs (Often Subtle or Absent)  No noticeable symptoms in the early stages.  Gradual loss of height (due to vertebral compression fractures).  Mild back pain (if vertebrae weaken or collapse).  Later Signs (Due to Fractures or Bone Weakness)  Fractures from minor trauma (e.g., a small fall or even coughing/sneezing).  Common sites: hip, spine (vertebrae), wrist, or ribs.  Severe back pain (from collapsed or fractured vertebrae).  Stooped posture (kyphosis or "dowager's hump") – due to multiple spinal fractures.  Decreased mobility due to pain or spinal deformities.  Shortness of breath (in severe cases, if spinal compression affects lung capacity).  Risk Factors (May Prompt Screening)  Postmenopausal women (due to estrogen decline).  Older age (especially over 65).  Family history of osteoporosis.  Long-term steroid use (e.g., prednisone).  Low body weight or small frame.  Smoking, excessive alcohol, or sedentary lifestyle.  Calcium/Vitamin D deficiency.  When to See a Doctor  If you experience an unexpected fracture.  Noticeable height loss or posture changes.  Persistent back pain without clear cause.  Diagnosis is confirmed via a bone density scan (DEXA scan). Early detection and treatment can help prevent fractures. |
| **Can osteoporosis cause pain?** | Osteoporosis is often termed a "silent disease" because it typically does not cause pain until a complication arises, such as a fracture. Here's a breakdown of how osteoporosis can lead to pain:  Fractures (Acute Pain):  Vertebral Compression Fractures: Sudden, severe back pain from collapsed vertebrae, often triggered by minor movements (e.g., bending or coughing).  Hip/Wrist Fractures: Intense pain following a fall, requiring immediate medical intervention.  Other Fractures: Ribs, pelvis, or other bones may fracture with minimal trauma, causing localized pain.  Chronic Pain:  Multiple Spinal Fractures: Can lead to chronic back pain, height loss, and kyphosis (a hunched posture), straining muscles and ligaments.  Postural Changes: Altered posture from spinal collapse may cause muscle fatigue and discomfort.  Other Contributors:  Microfractures: Small, undetected breaks in weakened bones might cause dull, persistent aches.  Nerve Compression: Rarely, collapsed vertebrae may press on nerves, causing radiating pain or numbness.  When to Seek Help: Sudden back pain, inability to move, or suspected fracture warrants immediate medical attention. Early diagnosis and treatment of osteoporosis (via medications, calcium/vitamin D, and lifestyle changes) can reduce fracture risk and associated pain. Managing chronic pain may involve physical therapy, pain relief strategies, or surgical options like vertebroplasty for severe spinal fractures.  In summary, osteoporosis itself isn’t painful, but its complications—primarily fractures—are significant pain sources. Preventive care is crucial to avoid these outcomes. |
| **How do fractures occur in people with osteoporosis?** | Fractures in individuals with osteoporosis result from a combination of reduced bone density and structural deterioration, making bones fragile and susceptible to breaks even under minimal stress. Here's a detailed breakdown:  Bone Structure Deterioration:  Loss of Bone Density: Osteoporosis disrupts the balance between bone resorption and formation, leading to porous, sponge-like bones with weakened trabecular (spongy) and cortical (compact) bone structures.  Compromised Architecture: The honeycomb-like trabecular network becomes sparse, reducing bone's ability to absorb impact. Cortical bone thins, diminishing overall strength.  Mechanisms of Fracture:  Low-Trauma Incidents: Minor falls (e.g., from standing height), bending, or lifting can cause fractures, which healthy bones would withstand.  Spontaneous Fractures: In severe cases, vertebral compression fractures may occur during daily activities (e.g., coughing) without trauma.  Common Fracture Sites:  Hip: Often due to falls, affecting the femoral neck. Critical due to mobility implications.  Spine (Vertebrae): Compression fractures from routine stress, leading height loss, kyphosis (stooped posture), and chronic pain.  Wrist (Distal Radius): Typically from falls onto an outstretched hand.  Contributing Factors:  Brittleness: Reduced collagen and protein matrix decreases flexibility, making bones prone to snapping rather than bending.  Muscle Weakness and Balance Issues: Common in aging, increasing fall risk and reducing shock absorption by muscles.  Microdamage Accumulation: Weakened bones accumulate tiny cracks over time, further compromising integrity.  Preventive Considerations:  Bone Health Management: Calcium, vitamin D, and medications to slow bone loss.  Fall Prevention: Strength training, balance exercises, and home safety modifications.  In essence, osteoporosis-related fractures stem from skeletal fragility, where compromised bone quality and external stressors intersect, particularly affecting weight-bearing and frequently stressed areas. |
| **Topic: Diagnosis** | |
| **How is osteoporosis diagnosed?** | Osteoporosis is diagnosed through a comprehensive approach that combines clinical evaluation, imaging, and laboratory tests to assess bone health and exclude other conditions. Here's a structured overview of the diagnostic process:  1. Clinical Evaluation  Medical History: Assessment of risk factors such as age (postmenopausal women, men over 70), family history, prior fractures, lifestyle (smoking, alcohol), and use of medications like glucocorticoids.  Physical Exam: Checking for signs like height loss, kyphosis (curved spine), or fragility fractures (e.g., from minor falls).  2. Bone Density Measurement  Dual-Energy X-ray Absorptiometry (DEXA/DXA):  The gold standard for measuring Bone Mineral Density (BMD).  Provides T-scores:  Normal: ≥ -1.0  Osteopenia (low bone mass): -1.0 to -2.5  Osteoporosis: ≤ -2.5  Common sites: Hip and lumbar spine.  Peripheral DEXA: Screens sites like the wrist or heel, often used in primary care settings.  3. Fracture Risk Assessment  FRAX® Tool: Estimates 10-year risk of major osteoporotic or hip fracture using factors like age, sex, BMI, and prior fractures. May guide treatment decisions when BMD is borderline (e.g., T-score -1.0 to -2.5).  4. Imaging for Fragility Fractures  X-rays: Detect fractures or vertebral compression fractures, though less sensitive for early bone loss.  Vertebral Fracture Assessment (VFA): Lateral spine imaging via DEXA to identify asymptomatic vertebral fractures.  5. Laboratory Tests  Blood/Urine Tests: Rule out secondary causes (e.g., hyperthyroidism, vitamin D deficiency, celiac disease).  Common tests: Calcium, vitamin D, thyroid function, parathyroid hormone, renal/liver function.  Markers of bone turnover (e.g., CTX, P1NP) may guide treatment monitoring.  6. Differential Diagnosis  Exclude conditions mimicking osteoporosis (e.g., osteomalacia, multiple myeloma) through clinical and lab findings.  7. Indications for Testing  Screening: Recommended for women ≥65, men ≥70, or younger individuals with risk factors (e.g., fragility fracture, steroid use).  Follow-up: Monitoring BMD every 1–2 years during treatment or for high-risk patients.  Summary  Diagnosis hinges on DEXA-confirmed low BMD (T-score ≤ -2.5) or the presence of a fragility fracture, supported by clinical context and exclusion of secondary causes. Risk stratification tools like FRAX® and laboratory workup further refine management strategies. Early detection and a multimodal approach are key to preventing fractures and managing osteoporosis effectively. |
| **What is a DEXA scan and how does it help in diagnosing osteoporosis?** | A DEXA scan (Dual-Energy X-ray Absorptiometry) is a non-invasive imaging test that measures bone mineral density (BMD). It is the gold standard for diagnosing osteoporosis, a condition characterized by weakened bones and increased fracture risk.  How It Works:  Dual-Energy X-ray Beams: The scan uses two low-dose X-ray beams with different energy levels.  One beam is absorbed more by soft tissue, the other by bone.  By comparing the absorption rates, the machine calculates bone density while subtracting soft tissue interference.  Key Areas Scanned:  Hip and lumbar spine (common fracture sites critical for mobility).  Sometimes the forearm in specific cases.  Diagnostic Role in Osteoporosis:  T-Score: Primary metric comparing the patient’s BMD to that of a healthy 30-year-old.  Normal: T-score ≥ -1.0  Osteopenia (low bone mass): T-score between -1.0 and -2.5  Osteoporosis: T-score ≤ -2.5 (per WHO criteria).  Z-Score: Compares BMD to age-, sex-, and ethnicity-matched peers. Helps assess younger patients or secondary causes of bone loss.  Clinical Benefits:  Early Detection: Identifies bone loss before fractures occur.  Fracture Risk Assessment: Lower BMD correlates with higher fracture risk (e.g., hip, spine).  Treatment Guidance: Determines if medication (e.g., bisphosphonates) or lifestyle changes are needed.  Monitoring: Tracks BMD changes over time to evaluate treatment efficacy.  Procedure Details:  Quick & Painless: Takes 10–20 minutes; no preparation required.  Low Radiation: Exposure is minimal (less than a chest X-ray).  Limitations:  Does not explain the cause of bone loss (additional tests may be needed).  May underestimate fracture risk in patients with other factors (e.g., prior fractures, family history).  In summary, a DEXA scan provides precise, quantitative data on bone health, enabling early diagnosis and management of osteoporosis to prevent debilitating fractures. |
| **At what age should I be screened for osteoporosis?** | The age at which you should be screened for osteoporosis depends on your sex, risk factors, and health guidelines. Here's a concise summary:  General Recommendations:  Women:  Age 65 and older: Routine screening is recommended for all women, per the U.S. Preventive Services Task Force (USPSTF).  Postmenopausal women under 65: Screen earlier if they have risk factors such as:  Family history of osteoporosis or fractures.  Low body weight or BMI <20.  Smoking, excessive alcohol use, or sedentary lifestyle.  Early menopause (before age 45).  Long-term steroid use (e.g., prednisone).  Medical conditions (e.g., rheumatoid arthritis, hyperthyroidism, malabsorption disorders).  Men:  Age 70 and older: Screening is advised by the National Osteoporosis Foundation (NOF).  Men aged 50–69: Consider screening if they have risk factors (e.g., low testosterone, prior fracture, chronic disease).  Additional Considerations:  Fractures: Anyone who experiences a fracture after age 50 (with minimal trauma) should be evaluated.  Ethnicity/Race: While osteoporosis risk varies (higher in White and Asian populations), screening is still recommended for all groups based on age and risk factors.  Transgender Individuals: Discuss personalized screening with a healthcare provider, especially if on long-term hormone therapy.  Screening Method:  A DXA scan (dual-energy X-ray absorptiometry) is the standard test to measure bone density.  Key Takeaway:  Discuss your individual risk factors with a healthcare provider to determine the best timing for screening. Early detection can help prevent fractures and manage bone health effectively. |
| **What does a T-score mean in a bone density test?** | A T-score in a bone density test (commonly performed via dual-energy X-ray absorptiometry, or DEXA) is a standardized measurement used to assess bone health and diagnose conditions like osteopenia and osteoporosis. Here's a detailed breakdown:  What Does the T-Score Represent?  Comparison to a Healthy Young Adult: The T-score compares an individual's bone mineral density (BMD) to the average BMD of a healthy, sex-matched 30-year-old adult.  Standard Deviation (SD) Units: It is calculated as:  T-score  =  Patient’s BMD  −  Young Adult Mean BMD  Standard Deviation (SD) of Young Adult BMD  T-score=  Standard Deviation (SD) of Young Adult BMD  Patient’s BMD−Young Adult Mean BMD  ​    This indicates how many SDs the patient’s BMD is above or below the reference average.  Interpretation of T-Scores  The World Health Organization (WHO) classifies results as follows:  Normal: T-score ≥ -1.0  Bone density is within the range of a healthy young adult.  Osteopenia (Low Bone Mass): T-score between -1.0 and -2.5  Indicates reduced bone density, signaling increased fracture risk.  Osteoporosis: T-score ≤ -2.5  Significantly low bone density, greatly elevating fracture risk. A diagnosis of osteoporosis can also be made if a fragility fracture occurs, regardless of the T-score.  Clinical Significance  Fracture Risk: Each 1 SD decrease in T-score (e.g., from -1.0 to -2.0) roughly doubles the risk of fracture.  Monitoring: T-scores help track bone density changes over time and assess treatment efficacy.  Population Use: Primarily applied to postmenopausal women and men over 50, as they are at higher risk for osteoporosis.  Limitations  Not the Sole Factor: Other risks (e.g., falls, family history, medications) also influence fracture likelihood.  Site-Specific: T-scores vary depending on the measured skeletal site (e.g., hip, spine).  Ethnicity/Gender Adjustments: Reference ranges may differ slightly based on demographics.  T-Score vs. Z-Score  Z-score: Compares BMD to age-, sex-, and ethnicity-matched peers. Used for younger adults, premenopausal women, or men under 50.  T-score: Focuses on fracture risk relative to peak bone mass (young adults).  Key Takeaway  The T-score is a critical tool for diagnosing bone loss severity and guiding interventions (e.g., lifestyle changes, medications). However, it should be interpreted alongside clinical context and other risk factors. |
| **Topic: Prevention and treatment** | |
| **How can I prevent osteoporosis?** | To prevent osteoporosis, a multifaceted approach focusing on nutrition, exercise, lifestyle modifications, and medical management is essential. Here's a structured strategy:  1. Nutrition:  Calcium Intake: Aim for 1,000–1,200 mg/day through diet (dairy products, leafy greens, fortified foods) or supplements if necessary.  Vitamin D: Ensure 600–800 IU/day via sunlight, fatty fish, fortified foods, or supplements to enhance calcium absorption.  Protein: Include adequate protein (0.8g/kg body weight) from lean meats, beans, and nuts to support bone matrix.  Other Nutrients: Consume magnesium (nuts, seeds), vitamin K (leafy greens), and potassium (fruits) for bone health.  2. Exercise:  Weight-Bearing Activities: Engage in walking, jogging, or dancing at least 30 minutes most days.  Strength Training: Perform resistance exercises 2–3 times weekly to stimulate bone growth.  Balance Training: Practice yoga or tai chi to reduce fall risk.  3. Lifestyle Adjustments:  Avoid Smoking: Smoking accelerates bone loss.  Limit Alcohol/Caffeine: Consume alcohol moderately (≤1 drink/day for women, ≤2 for men) and avoid excessive caffeine.  Maintain Healthy Weight: Avoid being underweight, which increases fracture risk.  4. Medical Management:  Screen Early: Bone density tests (DEXA) for postmenopausal women, those over 50, or high-risk individuals.  Medication Review: Discuss alternatives if on long-term corticosteroids or other bone-weakening drugs.  Hormone Therapy: Consider estrogen therapy for postmenopausal women after evaluating risks/benefits.  5. Fall Prevention:  Home Safety: Remove tripping hazards, improve lighting, and install grab bars.  Vision Checks: Regular eye exams to prevent falls.  6. Manage Health Conditions:  Address thyroid disorders, rheumatoid arthritis, or malabsorption issues that affect bone health.  By integrating these strategies, you can significantly reduce osteoporosis risk and maintain strong bones throughout life. Always consult healthcare providers for personalized plans. |
| **What kind of exercises are beneficial for bone health?** | To promote bone health, it's essential to engage in exercises that apply stress to the bones, stimulating them to strengthen and maintain density. Here’s a structured approach to beneficial exercises:  1. Weight-Bearing Exercises  High-Impact: Activities that involve impact with the ground, which stimulate bone formation.  Examples: Running, jogging, jumping rope, stair climbing, dancing, tennis.  Benefits: Particularly effective for hips and lower spine.  Caution: Avoid if you have joint issues or osteoporosis; consult a healthcare provider.  Low-Impact: Suitable for those needing joint-friendly options.  Examples: Brisk walking, elliptical training, low-impact aerobics.  Benefits: Safer for beginners or older adults while still supporting bone density.  2. Resistance Training  Activities: Use external weights or body weight to create muscle tension that stresses bones.  Examples: Weightlifting, squats, lunges, push-ups, deadlifts, resistance bands.  Focus Areas: Target major muscle groups, especially hips, spine, and wrists.  Tip: Aim for progressive overload (gradually increasing weight/resistance).  3. Balance and Flexibility Exercises  Purpose: Reduce fall risk by improving stability and coordination.  Examples: Tai chi, yoga (weight-bearing poses like Downward Dog, Warrior), Pilates.  Benefits: Indirectly protect bones by preventing fractures from falls.  4. Plyometrics (Jump Training)  Activities: Explosive movements that enhance bone and muscle strength.  Examples: Box jumps, jump squats, burpees.  Caution: Ensure proper technique and baseline fitness; avoid if bone density is low.  5. Targeted Exercises for Vulnerable Areas  Hips and Spine: Strengthen these osteoporosis-prone regions.  Examples: Leg presses, step-ups, back extensions, rowing.  Tip: Combine with core-strengthening exercises (e.g., planks) for spinal support.  Key Considerations:  Frequency: Aim for 30+ minutes of weight-bearing exercise 3–5 days/week and resistance training 2–3 days/week.  Precautions: Prioritize proper form; avoid high-impact activities if at risk of fracture. Consult a healthcare provider for personalized advice.  Holistic Approach: Pair exercise with adequate calcium, vitamin D, and protein intake for optimal bone health.  By incorporating these exercises consistently and progressively, you can enhance bone strength and reduce the risk of osteoporosis-related complications. |
| **What dietary changes should I make to prevent or treat osteoporosis?** | To prevent or treat osteoporosis through dietary changes, focus on nutrients that support bone health and minimize factors that weaken bones. Here's a structured approach:  Key Nutrients & Food Sources  Calcium  Daily Needs: 1,000–1,200 mg/day (varies by age/gender).  Sources: Dairy (milk, yogurt, cheese), fortified plant milks, leafy greens (kale, bok choy), canned fish with bones (sardines, salmon), tofu, almonds.  Tip: Pair high-oxalate greens (spinach, beet greens) with vitamin C to enhance absorption.  Vitamin D  Daily Needs: 600–800 IU (may require supplements in low-sunlight areas).  Sources: Fatty fish (salmon, mackerel), egg yolks, fortified foods, sunlight exposure.  Protein  Role: Supports bone density. Aim for 0.8–1.0 g/kg body weight daily.  Sources: Lean meats, fish, legumes, nuts, dairy.  Magnesium & Vitamin K  Sources: Nuts, seeds, whole grains (magnesium); leafy greens, broccoli (vitamin K).  Potassium  Role: Reduces calcium loss.  Sources: Bananas, oranges, potatoes, avocados.  Foods to Limit  Excess Sodium: High salt intake increases calcium excretion. Avoid processed foods.  Phosphorus-Rich Processed Foods: Sodas and processed meats can disrupt calcium balance.  Alcohol & Caffeine: Limit to 1–2 drinks/day and <3 cups of coffee daily.  Lifestyle Considerations  Exercise: Combine diet with weight-bearing exercises (walking, resistance training).  Avoid Smoking: Impairs bone health.  Maintain Healthy Weight: Being underweight or obese increases osteoporosis risk.  Practical Tips  Diverse Diet: Follow patterns like the Mediterranean diet for balanced nutrient intake.  Lactose Intolerance: Opt for lactose-free dairy, fortified plant milks, or leafy greens.  Supplements: Consult a healthcare provider before starting calcium/vitamin D supplements to avoid risks (e.g., kidney stones).  Meal Ideas  Breakfast: Greek yogurt with almonds and berries.  Lunch: Salmon salad with kale and olive oil dressing.  Snack: Fortified orange juice or a handful of nuts.  Dinner: Stir-fried tofu with bok choy and quinoa.  Consult a professional for personalized advice, especially if you have conditions affecting nutrient absorption (e.g., celiac disease) or are postmenopausal. Combining diet, exercise, and regular check-ups offers the best protection against osteoporosis. |
| **Do calcium and vitamin D supplements help in osteoporosis?** | Calcium and vitamin D supplements play a role in managing osteoporosis, particularly in individuals with deficiencies or inadequate dietary intake. Here's a structured summary of their benefits and considerations:  Role in Bone Health  Calcium: Essential for maintaining bone density, as it is a primary component of bone. The body cannot produce calcium, so adequate intake through diet or supplements is crucial.  Vitamin D: Facilitates calcium absorption in the gut. Deficiency, common in older adults or those with limited sun exposure, can impair calcium utilization.  Effectiveness in Osteoporosis  Fracture Risk Reduction: Studies, including the Women's Health Initiative, suggest that combined calcium and vitamin D supplementation may modestly reduce fracture risk, particularly in those adherent to supplementation. Effects are more pronounced in individuals with baseline deficiencies.  Bone Density: Supplements can help slow bone density loss, though the impact is often small compared to other osteoporosis medications (e.g., bisphosphonates).  Considerations for Supplementation  Dosage:  Calcium: Recommended daily intake is 1,000–1,200 mg for adults, ideally from dietary sources (dairy, leafy greens). Supplements (e.g., calcium carbonate or citrate) are advised if dietary intake is insufficient.  Vitamin D: 600–800 IU daily for most adults, with higher doses for deficiency. Blood tests can guide personalized needs.  Risks: Excess calcium from supplements may link to kidney stones or cardiovascular concerns, though evidence is inconclusive. Vitamin D toxicity is rare but possible at very high doses.  Holistic Management  Lifestyle: Weight-bearing exercise, smoking cessation, and limiting alcohol are critical.  Medical Treatments: Supplements are often combined with medications (e.g., bisphosphonates, hormone therapy) for optimal results.  Guidelines and Recommendations  Organizations like the National Osteoporosis Foundation endorse calcium and vitamin D as part of a comprehensive approach. Dietary sources are preferred, but supplements are recommended when dietary intake falls short.  Conclusion  Calcium and vitamin D supplements are beneficial in osteoporosis management, particularly for those with deficiencies. They should be part of a broader strategy including lifestyle modifications and medical treatments. Individual needs vary, so consulting healthcare providers for personalized advice is essential. |
| **What medications are available to treat osteoporosis?** | Medications for Osteoporosis Treatment  Osteoporosis treatment aims to reduce fracture risk by slowing bone loss or promoting bone formation. Medications are categorized into antiresorptive (inhibit bone breakdown) and anabolic (stimulate bone formation) agents. Here's a structured overview:  1. Antiresorptive Medications  Bisphosphonates (First-line treatment)  Examples:  Alendronate (Fosamax), risedronate (Actonel) – oral, weekly/monthly.  Ibandronate (Boniva) – oral monthly or IV quarterly.  Zoledronic acid (Reclast) – IV once yearly.  Mechanism: Inhibit osteoclast activity, reducing bone resorption.  Notes: Long-term use (>5 years) may require evaluation due to rare risks (atypical fractures, osteonecrosis of the jaw). Avoid in severe kidney impairment.  Monoclonal Antibodies  Denosumab (Prolia):  Mechanism: Targets RANK ligand, reducing osteoclast formation.  Administration: Subcutaneous injection every 6 months.  Notes: Suitable for patients with kidney issues. Requires ongoing treatment to prevent rebound bone loss.  Selective Estrogen Receptor Modulators (SERMs)  Raloxifene (Evista):  Mechanism: Mimics estrogen’s bone-protective effects without breast/uterine risks.  Notes: Reduces vertebral fractures. Side effects include hot flashes and thromboembolism risk.  Hormone Replacement Therapy (HRT)  Estrogen Therapy:  Use: Primarily for postmenopausal women with significant symptoms (e.g., hot flashes).  Risks: Increased thrombosis, stroke, and breast cancer risk. Not first-line for osteoporosis alone.  Calcitonin  Administration: Nasal spray or injection.  Mechanism: Inhibits osteoclasts and reduces pain post-fracture.  Notes: Weak efficacy; reserved for patients intolerant to other therapies. Long-term use linked to cancer risk in animal studies.  2. Anabolic Medications  Parathyroid Hormone (PTH) Analogs  Examples:  Teriparatide (Forteo), abaloparatide (Tymlos) – daily subcutaneous injections.  Mechanism: Stimulate osteoblast activity to build bone.  Notes: Limited to 2 years of use due to osteosarcoma risk (animal studies). Followed by antiresorptive therapy to maintain gains.  Monoclonal Antibody (Sclerostin Inhibitor)  Romosozumab (Evenity):  Mechanism: Blocks sclerostin, increasing bone formation and reducing resorption.  Administration: Monthly subcutaneous injections for 1 year.  Notes: Black box warning for cardiovascular risk; contraindicated in patients with recent MI or stroke.  3. Adjunctive Therapies  Calcium and Vitamin D: Essential for bone health, often prescribed alongside medications.  Lifestyle Modifications: Weight-bearing exercise, smoking cessation, and limiting alcohol.  Treatment Considerations  First-line: Bisphosphonates or denosumab.  Severe Cases/High Fracture Risk: Anabolic agents (e.g., teriparatide, romosozumab) followed by antiresorptives.  Individual Factors: Age, sex, kidney function, cardiovascular health, and fracture risk guide therapy choice.  Note: Regular monitoring (e.g., DEXA scans) and addressing underlying causes (e.g., vitamin D deficiency) are critical for optimal management. Always consult a healthcare provider for personalized treatment plans. |
| **How long do I need to take medication for osteoporosis?** | The duration of osteoporosis medication varies based on the type of medication, individual risk factors, and treatment response. Here's a structured overview:  1. Medication Classes and Typical Durations  Bisphosphonates (e.g., alendronate, risedronate, zoledronic acid):  Oral: 3–5 years initially.  IV (zoledronic acid): Up to 6 years.  Drug Holidays: After 3–5 years, a break may be considered if bone density stabilizes and fracture risk decreases. Monitoring continues during this period.  Denosumab (Prolia®):  Administered every 6 months via injection.  No fixed end date, but abrupt cessation can cause rapid bone loss. Transitioning to bisphosphates may be needed if stopped.  Anabolic Agents (e.g., teriparatide, abaloparatide, romosozumab):  Short-term use: 1–2 years (teriparatide/abaloparatide: 2 years; romosozumab: 1 year).  Followed by antiresorptive therapy (e.g., bisphosphonates) to maintain gains.  2. Key Factors Influencing Duration  Fracture Risk: High-risk patients (e.g., prior fractures, very low bone density) may require longer treatment.  Monitoring: Regular DEXA scans and clinical reviews (every 1–2 years) guide adjustments.  Side Effects: Long-term bisphosphonate use may increase rare risks (e.g., atypical fractures), prompting drug holidays in stable patients.  Rebound Risk: Denosumab requires careful management if discontinued to avoid rapid bone loss.  3. Lifestyle and Follow-Up  Adjunct Measures: Calcium, vitamin D, weight-bearing exercise, and fall prevention enhance treatment efficacy.  Individualized Plans: Treatment is tailored to age, sex, comorbidities, and patient preferences.  4. Critical Consideration  Never stop medication abruptly without medical guidance, especially denosumab or anabolics, to avoid complications.  Summary  Work closely with your healthcare provider to balance benefits and risks, ensuring periodic reassessment of your treatment plan. Most patients require at least 3–5 years of therapy, with adjustments based on progress and evolving health status. |
| **Are there any side effects of osteoporosis treatments?** | Osteoporosis treatments vary in their mechanisms and associated side effects. Here's a structured overview:  1. Bisphosphonates (e.g., alendronate, risedronate)  Common: Gastrointestinal issues (heartburn, esophageal irritation), musculoskeletal pain.  Rare but Serious:  Osteonecrosis of the jaw (especially with dental procedures).  Atypical femur fractures (long-term use).  Considerations: Administered orally with specific instructions (empty stomach, upright posture); kidney function monitoring required.  2. Denosumab (Injectable Monoclonal Antibody)  Common: Injection-site reactions, hypocalcemia (requires calcium/vitamin D supplementation).  Serious Risks: Increased fracture risk upon discontinuation; potential infections due to immune modulation.  Monitoring: Regular calcium levels and bone density checks.  3. Parathyroid Hormone Analogs (Teriparatide, Abaloparatide)  Common: Leg cramps, dizziness, injection-site reactions.  Black Box Warning: Osteosarcoma risk (observed in rodents; contraindicated in those with prior radiation).  Usage: Limited to 18–24 months due to safety concerns.  4. SERMs (Raloxifene)  Common: Hot flashes, leg cramps.  Serious Risks: Increased thromboembolic events (similar to estrogen).  Considerations: Avoid in patients with clotting history.  5. Hormone Replacement Therapy (HRT)  Risks: Breast tenderness, blood clots, stroke, and increased breast/endometrial cancer risk.  Usage: Generally reserved for younger postmenopausal women or those with significant menopausal symptoms.  6. Romosozumab (Monoclonal Antibody)  Common: Hypocalcemia (requires supplementation).  Serious Risks: Cardiovascular events (e.g., MI, stroke); contraindicated in recent cardiac history.  Rare: Osteonecrosis of the jaw.  7. Calcitonin  Common: Nasal irritation (nasal spray), nausea.  Rare: Allergic reactions; potential cancer risk with prolonged use (less commonly used now).  General Considerations:  Monitoring: Regular bone density scans, renal function (bisphosphonates), and calcium levels.  Lifestyle: Adequate calcium/vitamin D intake, weight-bearing exercise, and fall prevention.  Individualized Care: Side effects vary; treatment choice depends on patient history, risk factors, and preferences. Drug holidays may be considered for long-term bisphosphonate use.  Conclusion: Patients should discuss potential side effects with their healthcare provider to tailor treatment and ensure vigilant monitoring for adverse effects. |
| **Can osteoporosis be reversed with treatment?** | Osteoporosis, characterized by decreased bone density and increased fracture risk, cannot typically be fully reversed to restore bone density to normal youthful levels. However, treatment can significantly improve bone strength and reduce fracture risk through a combination of therapies:  Medications:  Antiresorptive Agents (e.g., bisphosphonates, denosumab): Slow bone loss, stabilize density, and reduce fracture risk.  Anabolic Agents (e.g., teriparatide, abaloparatide, romosozumab): Stimulate new bone formation, potentially increasing bone mineral density (BMD) and improving structural integrity.  Lifestyle Interventions:  Nutrition: Adequate calcium (1,000–1,200 mg/day) and vitamin D (600–800 IU/day) intake.  Exercise: Weight-bearing and resistance training to stimulate bone remodeling.  Avoidance of Risk Factors: Limiting alcohol, quitting smoking, and preventing falls.  Monitoring: Regular BMD testing (DXA scans) tracks progress, with some patients moving from osteoporosis to osteopenia categories.  Outcome: While "reversal" to normal BMD is rare, treatments can partially restore density, reduce fracture risk, and improve quality of life. Early intervention (e.g., in osteopenia) yields better outcomes. Current therapies focus on management rather than cure, with ongoing research exploring regenerative approaches. |
| **Topic: Prognosis** | |
| **Can I live a normal life with osteoporosis?** | Yes, you can live a normal life with osteoporosis by taking proactive steps to manage the condition and reduce risks. Here’s how:  Key Strategies for a Full Life with Osteoporosis:  Medical Management:  Medications: Bisphosphonates, hormone therapy, or other prescribed drugs can slow bone loss and promote strength.  Regular Monitoring: Bone density scans (DEXA) and doctor visits help track progress and adjust treatments.  Lifestyle Adjustments:  Nutrition: Prioritize calcium-rich foods (dairy, leafy greens) and vitamin D (sunlight, supplements) for bone health.  Exercise: Engage in weight-bearing activities (walking, yoga) and resistance training to strengthen bones and muscles. Avoid high-impact or twisting motions that risk injury.  Avoid Smoking/Excessive Alcohol: Both accelerate bone loss.  Fall Prevention:  Home Safety: Remove tripping hazards, install grab bars, and ensure good lighting.  Balance Training: Practices like tai chi or physical therapy can improve stability.  Mental and Emotional Well-being:  Stay socially active and seek support groups or counseling if anxiety or fear arises. A positive mindset is crucial.  Adaptive Habits:  Use assistive devices (canes, walkers) if needed, and modify activities (e.g., gardening seated) to stay engaged safely.  Realistic Outlook:  Most people with osteoporosis maintain independence and continue daily activities, work, and hobbies with minor adjustments.  Fracture risk decreases significantly with proper care, though vigilance is key—especially for spine and hip protection.  When to Be Cautious:  Severe osteoporosis may require stricter precautions, but adaptive tools and strategies still enable a fulfilling life.  In short: Osteoporosis requires attention, but it doesn’t define your life. With a tailored plan, you can thrive while minimizing limitations. Always consult your healthcare team to personalize your approach. |

**Footnotes:** All supplementary materials correspond to the same set of 25 questions presented in Supplementary Figure 1.

Responses are reproduced verbatim from the model outputs without manual editing.

Abbreviations: LLM = large language model; IQR = interquartile range.
